# Supplementary material for: An improved pathway for autonomous bioluminescence imaging in eukaryotes
Source: PubMed Central journal article supplement (PMC10927554; doi:10.1038/s41592-023-02152-y), 2024-01-22
Supplement: 41592_2023_2152_MOESM1_ESM.pdf [file 41592_2023_2152_MOESM1_ESM.pdf]

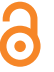

---

# An improved pathway for autonomous bioluminescence imaging in eukaryotes

---

In the format provided by the authors and unedited

*Escherichia coli*, lysates,  
after 100  $\mu$ M luciferin treatment

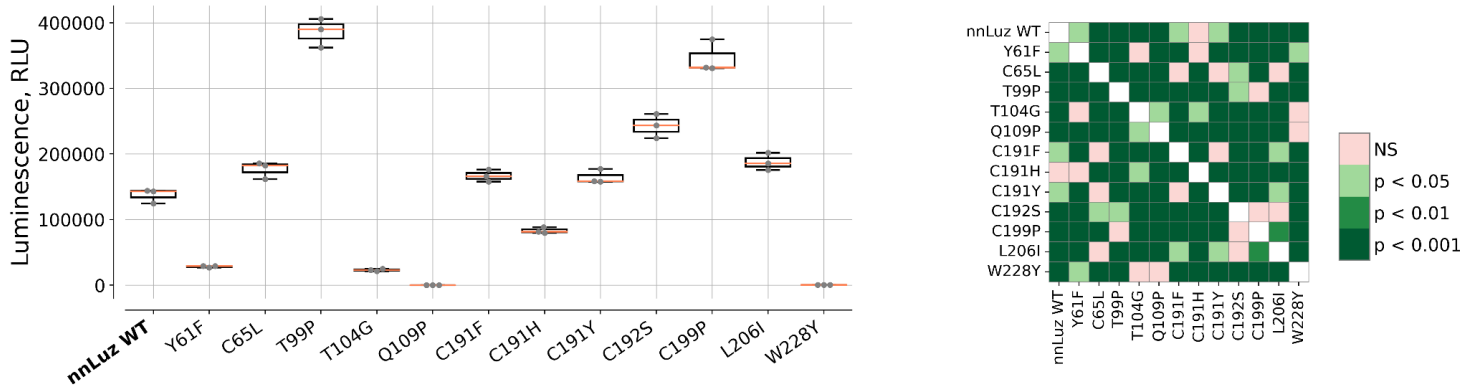

**Supplementary Figure 1.** Activity of nnLuz mutants obtained in consensus mutagenesis in *E. coli* lysates, after treatment with 100  $\mu$ M of luciferin. Imaging was performed at room temperature. Maximal brightness of luminescence is shown. Box and whisker plots (left) are accompanied by colour-coded p-values of post-hoc two-sided Conover's test (right) corrected by the step-down method using Sidak adjustments. NS – non-significant. The boxes are the first and the third quartiles, whiskers are the rest of the distribution except outliers, the orange line is the median. N = 3 biologically independent samples per box plot. Kruskal-Wallis H Test: H-statistic = 37.20, p = 2.1e-04.

**a** *Escherichia coli*, lysates,  
after 100  $\mu$ M luciferin treatment

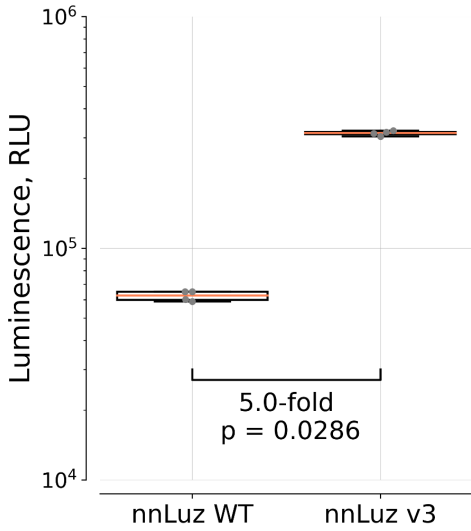

**b** HEK293, transient expression,  
after 740  $\mu$ M luciferin treatment

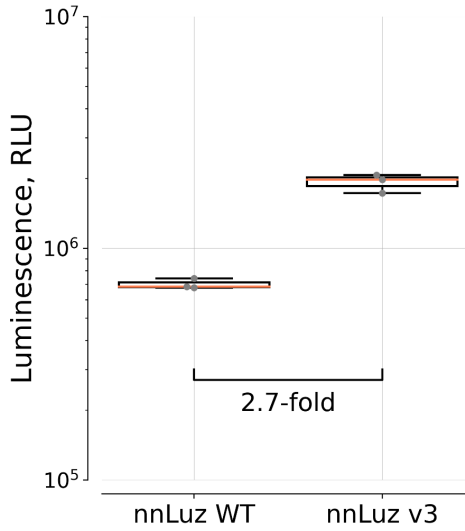

**Supplementary Figure 2.** Activity of nnLuz v3 (T99P, T192S, A199P) mutant in *E. coli* lysates (**a**) and in transient expression in HEK293 cells (**b**) after treatment with 100 or 740  $\mu$ M luciferin, respectively. Experiments in *E. coli* lysates were performed at room temperature, in mammalian cells – at 37°C. Maximal brightness of luminescence is shown. The boxes are the first and the third quartiles, whiskers are the rest of the distribution except outliers, the orange line is the median. The difference between mean values and p-values of post-hoc two-sided Mann-Whitney U-tests (if applicable) are indicated below the brackets between the box plots. N = 4 (**a**) or 3 (**b**) biologically independent samples per box plot.

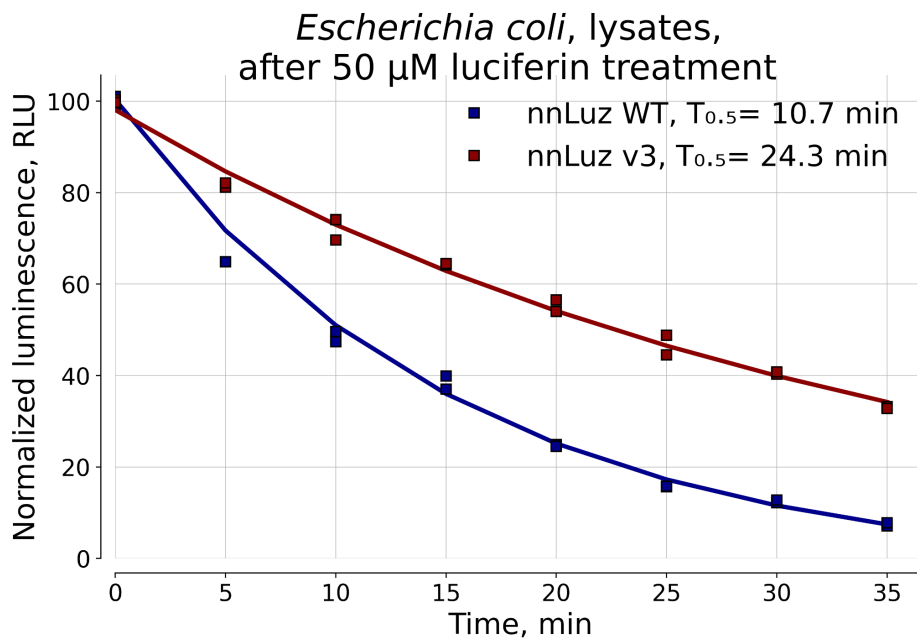

**Supplementary Figure 3.** Activity of nnLuz WT and nnLuz v3 (T99P, T192S, A199P) in *E. coli* cleared lysates after incubation at 22°C during different periods of time followed by treatment with luciferin (50  $\mu$ M). Data points are normalised to the data at the time = 0 min. Data is shown as data points (squares) and fitting curves (lines). Data is fitted with an exponential decay equation. N = 2 biologically independent samples.



*Escherichia coli*, lysates,  
after 100  $\mu$ M luciferin treatment

a

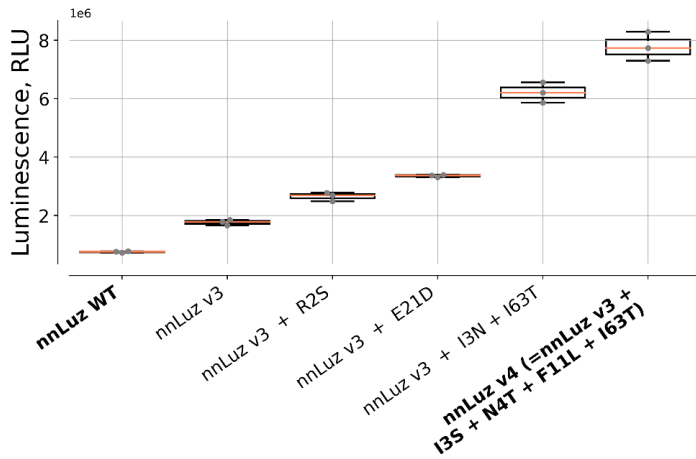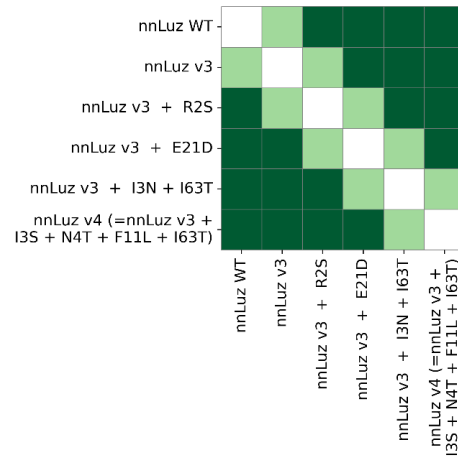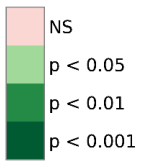

HEK293, transient expression,  
after 740  $\mu$ M luciferin treatment

b

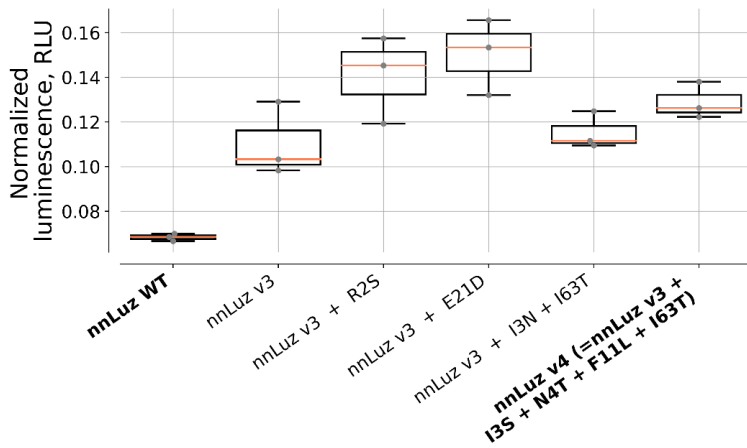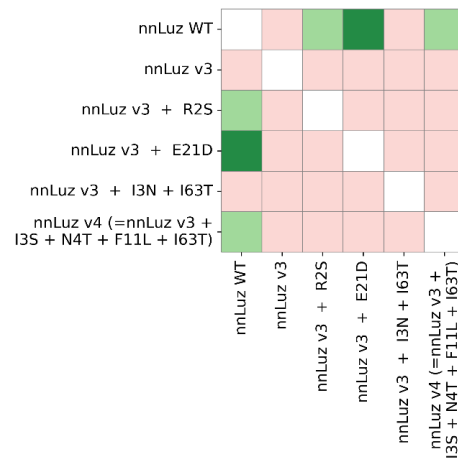

**Supplementary Figure 4.** Activity of mutants obtained after random mutagenesis of nnLuz v3 in *E. coli* lysates (a) and in transient expression in HEK293 cells (b) after treatment with luciferin. Maximal brightness of luminescence is shown. In HEK293 luminescence signal was normalised to protein abundance, as measured by HiBiT assay. Box and whisker plots (left) are accompanied by colour-coded p-values of post-hoc two-sided Conover's test (right) corrected by the step-down method using Sidak adjustments. NS – non-significant. The boxes are the first and the third quartiles, whiskers are the rest of the distribution except outliers, the orange line is the median. N = 3 biologically independent samples per box plot. Kruskal-Wallis H Test: H-statistic = 16.58, p = 5.4e-03 (a) and H-statistic = 12.84, p = 2.5e-02 (b).

*Pichia pastoris*, stable, after 50  $\mu$ M luciferin treatment

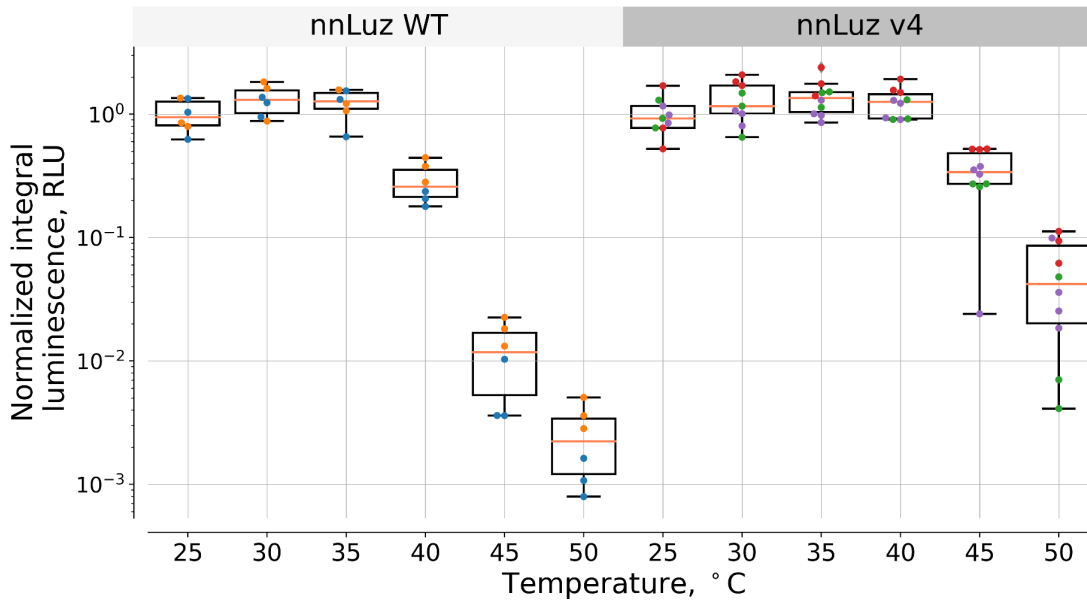

**Supplementary Figure 5.** Luminescence of yeast cells expressing luciferase variants, after 10 min incubation at different temperatures followed by treatment with luciferin (50  $\mu$ M). The integral luminescence for 10 min normalised to the integral signal obtained after incubation at 25°C is shown. The boxes are the first and the third quartiles, whiskers are the rest of the distribution except outliers, the orange line is the median. The colour of data points indicates different yeast strains (2 strains for nnLuz WT and 3 strains for nnLuz v4). N = 6-10 biologically independent samples per box plot.

## *Pichia pastoris*, lysates

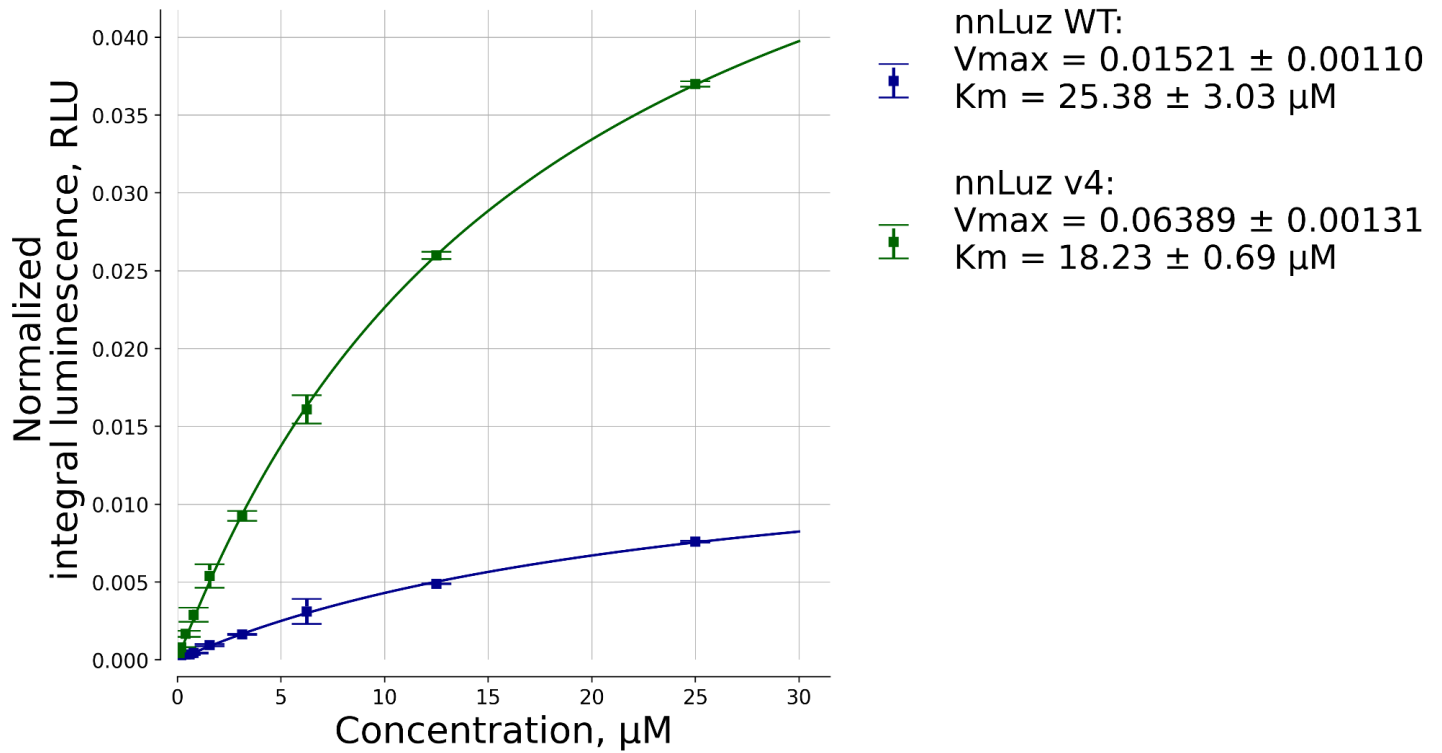

Supplementary Figure 6. Michaelis–Menten curve of nnLuz WT/v4–HiBIT fusions obtained from yeast lysates in the presence of 0.1 - 25  $\mu\text{M}$  fungal luciferin. Data normalized to expression level assessed by HiBit luminescence. Data is shown as data points (squares)  $\pm$  SD (whiskers) and fitting curves (lines). Data is fitted with a Michaelis-Menten equation. N = 3 biologically independent samples per box plot.

HEK293, transient expression,  
after 0.8 mM hispidin treatment

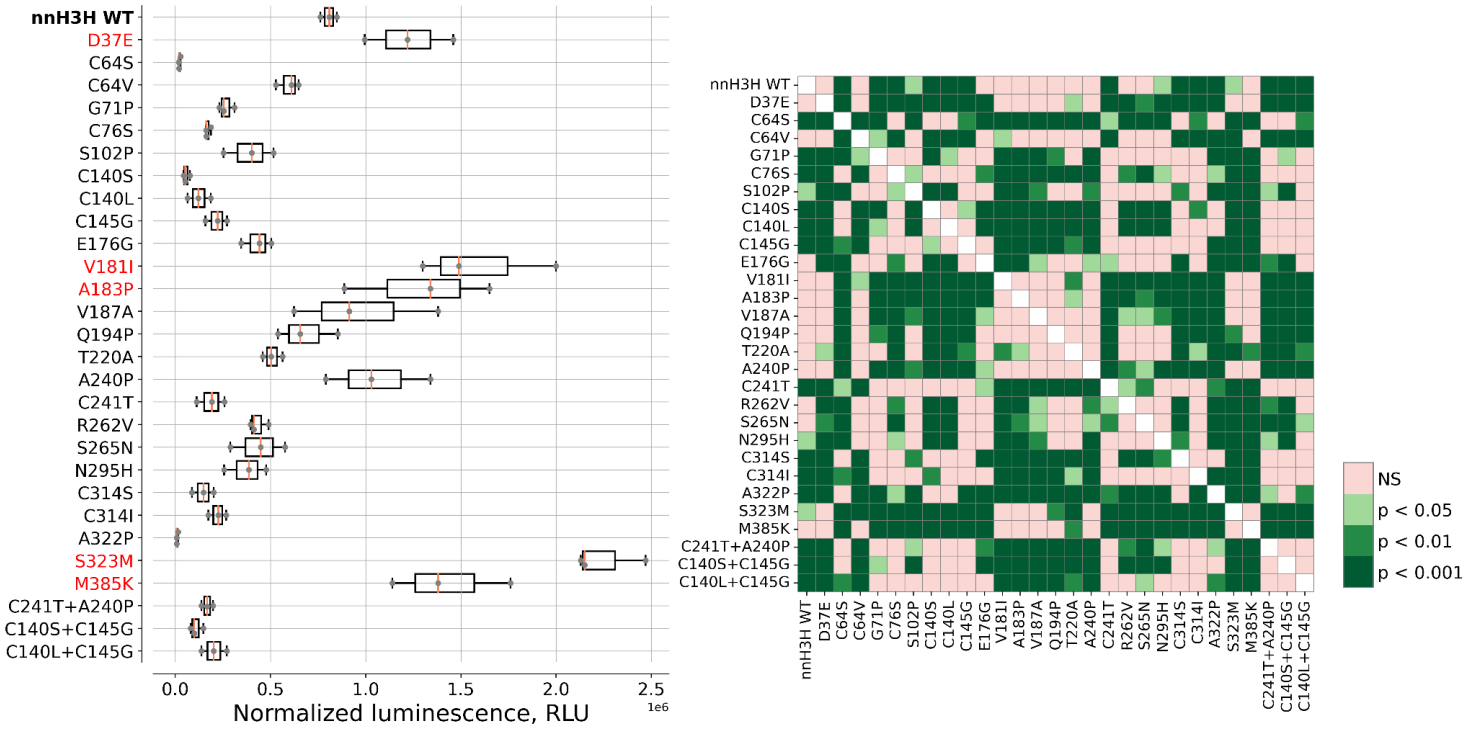

**Supplementary Figure 7.** Activity of mutants obtained in consensus mutagenesis of nnH3H. Transient co-expression of depicted nnH3H mutants with nnLuz v3 in HEK293 cells, luminescence measured after addition of 0.8 mM hispidin. Luminescence signal was normalised to protein abundance, as measured by HiBiT assay. Red labels correspond to mutations with improved luminescence. Box and whisker plots (left) are accompanied by colour-coded p-values of post-hoc two-sided Conover's test (right) corrected by the step-down method using Sidak adjustments. NS – non-significant. The boxes are the first and the third quartiles, whiskers are the rest of the distribution except outliers, the orange line is the median. N = 3 biologically independent samples per box plot. Kruskal-Wallis H Test: H-statistic = 82.22,  $p = 3.1e-07$ .

HEK293, transient expression,  
after 0.8 mM hispidin or luciferin treatment

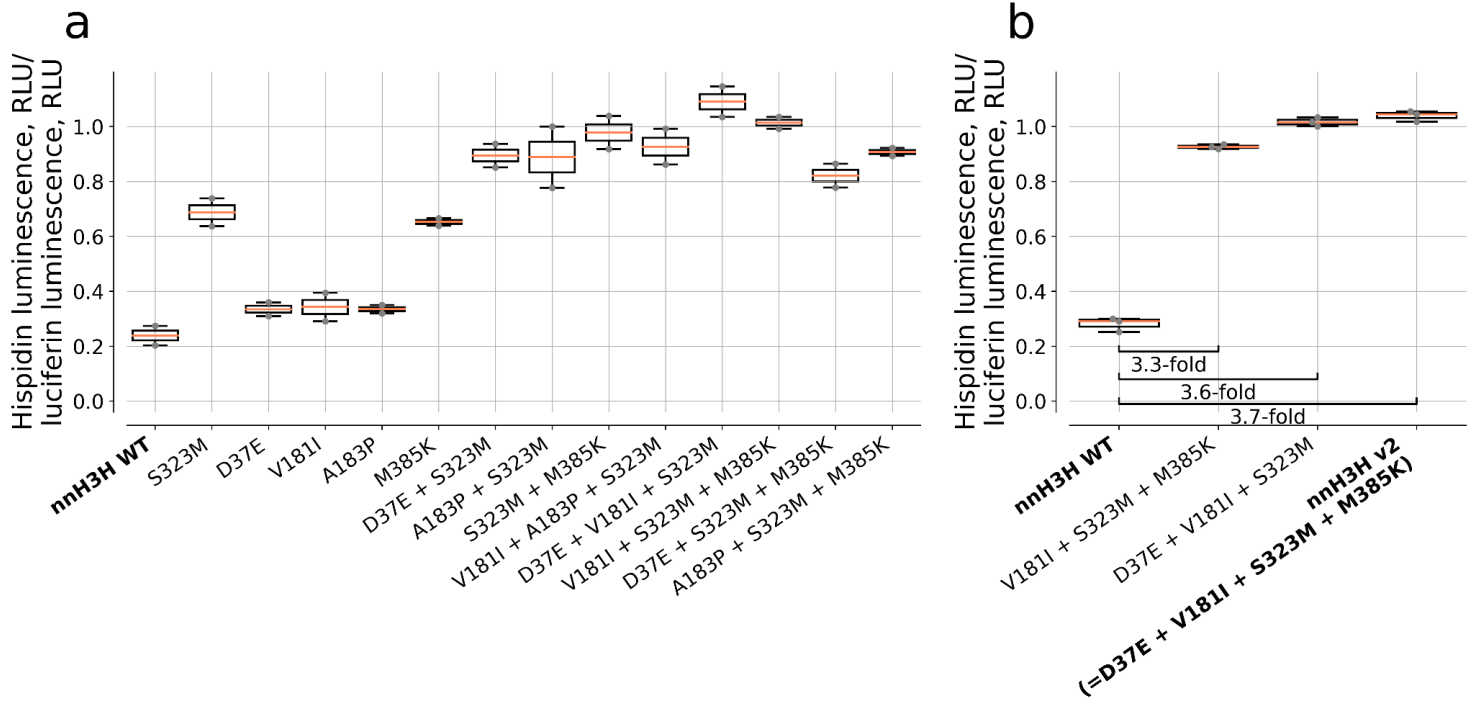

**Supplementary Figure 8.** Activity of nnH3H mutants in transient expression with nnLuz v3 in HEK293 after treatment with 0.8 mM of luciferin or hispidin. **a.** Combinatorial mutation analysis of nnH3H. N = 2 biologically independent samples per box plot. **b.** Follow-up experiment to assess selected combinations of mutations. N = 3 biologically independent samples per box plot. The boxes are the first and the third quartiles, whiskers are the rest of the distribution except outliers, the orange line is the median.

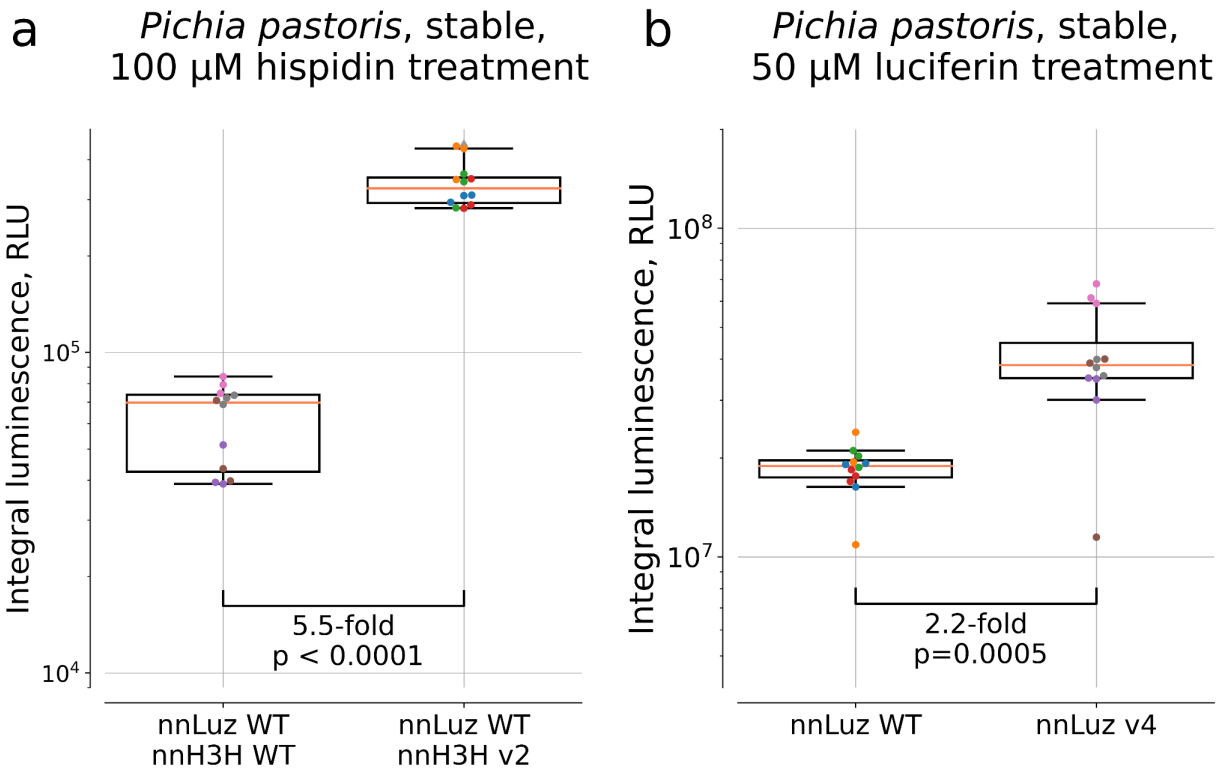

**Supplementary Figure 9. Comparison of WT and improved enzymes of nnH3H and nnLuz in *P. pastoris*.**

Luminescence was assayed after adding 100  $\mu$ M hispidin (a) and 50  $\mu$ M luciferin (b). Integral signal was collected for 20 (a) and 10 min (b). The boxes are the first and the third quartiles, whiskers are the rest of the distribution except outliers, the orange line is the median. The colour of data points indicates different yeast strains (4 per box plot). N = 12 biologically independent samples per box plot. The difference between mean values and p-values of post-hoc two-sided Mann-Whitney U-tests are indicated below the brackets between the box plots, p = 3.7e-05 (a), p = 4.8e-04 (b).

*Nicotiana benthamiana*, transient expression

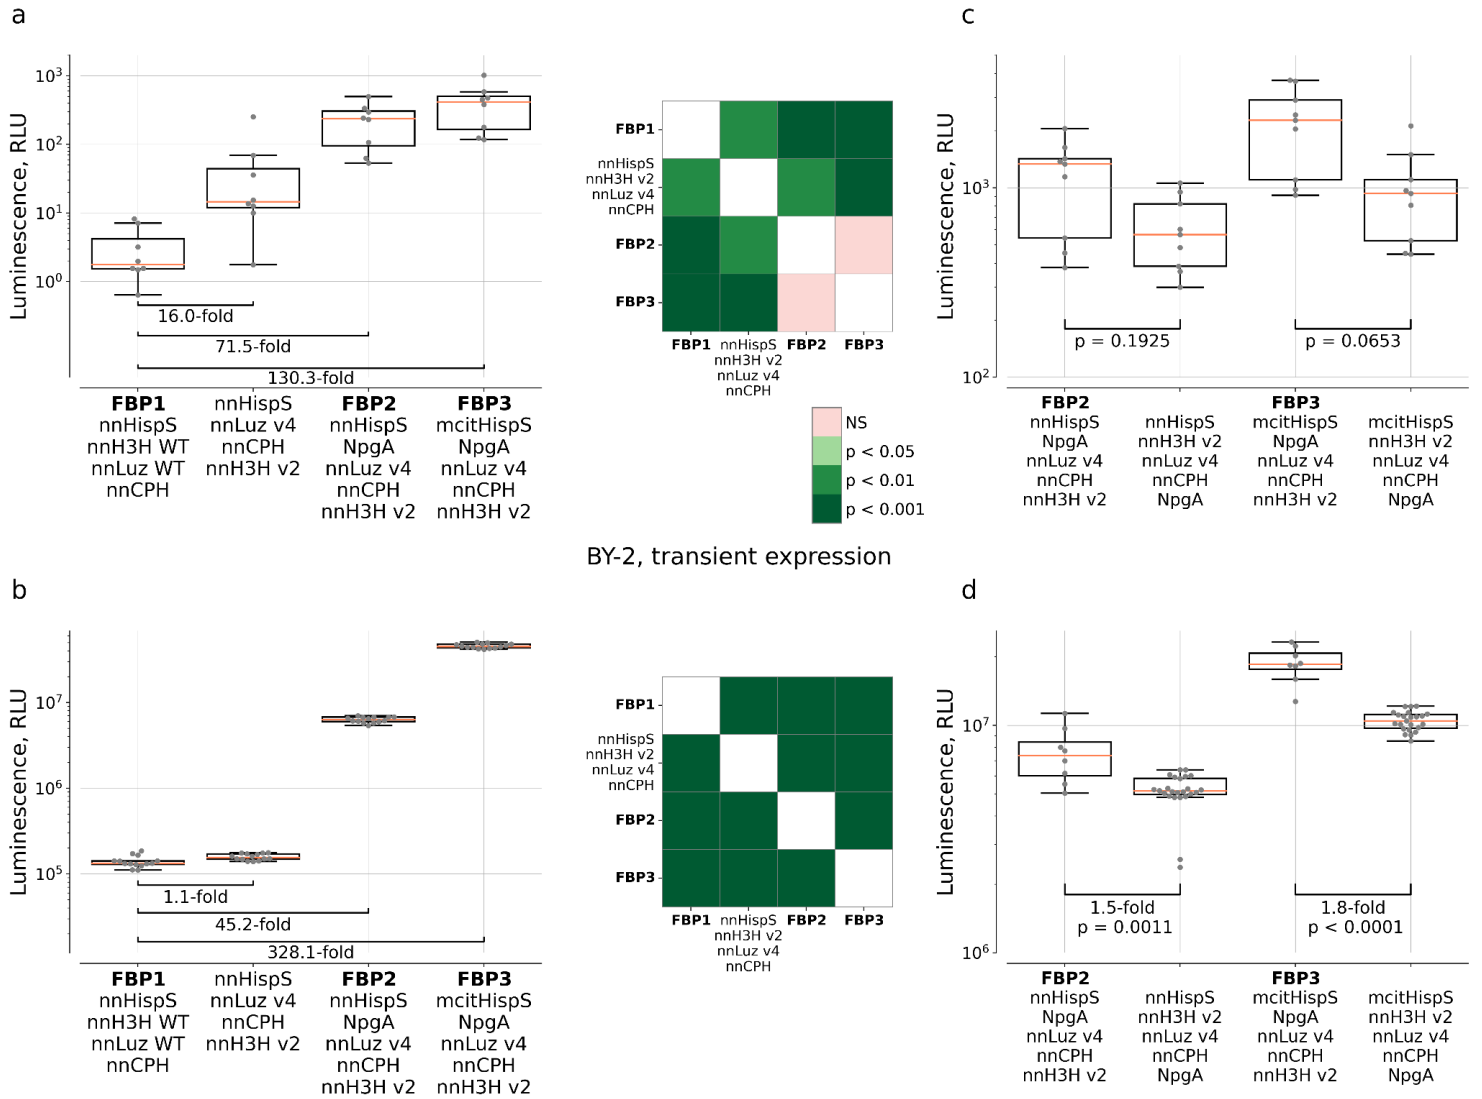

**Supplementary Figure 10. Comparison of FBP versions, and assembly variants with different order of transcription units.** The experiments were performed in *N.benthamiana* leaves (a, c) and BY-2 plant cell packs (b, d). Named versions refer to plasmids shown on Extended Data Figure 4 (a, b). The order of gene names in the labels of the X axis corresponds to the order of transcription units in multi-gene plasmids. Box and whisker plots are accompanied by colour-coded p-values of two-sided Conover's test corrected by the step-down method using Sidak adjustments (a, b). NS – non-significant. The boxes are the first and the third quartiles, whiskers are the rest of the distribution except outliers, the orange line is the median. N = 8 (a) or 9 (c) leaves per box plot, N = 14 (b) or 8-24 (d) cell packs per box plot. The difference between mean values is indicated below the brackets between the box plots, in (c, d) supplied with p-value of post-hoc two-sided Mann-Whitney U-test. In (d) p = 1.1e-03 and 2.5e-07 for FBP2 vs nnHispS + nnH3H v2 + nnLuz v4 + nnCPH + NpgA and FBP3 vs mcitHispS + nnH3H v2 + nnLuz v4 + nnCPH + NpgA, respectively. Kruskal-Wallis H Test: H-statistic = 23.59, p = 3.0e-5 (a) and H-statistic = 48.10, p = 2.0e-10 (b).

*Nicotiana benthamiana*, transient expression

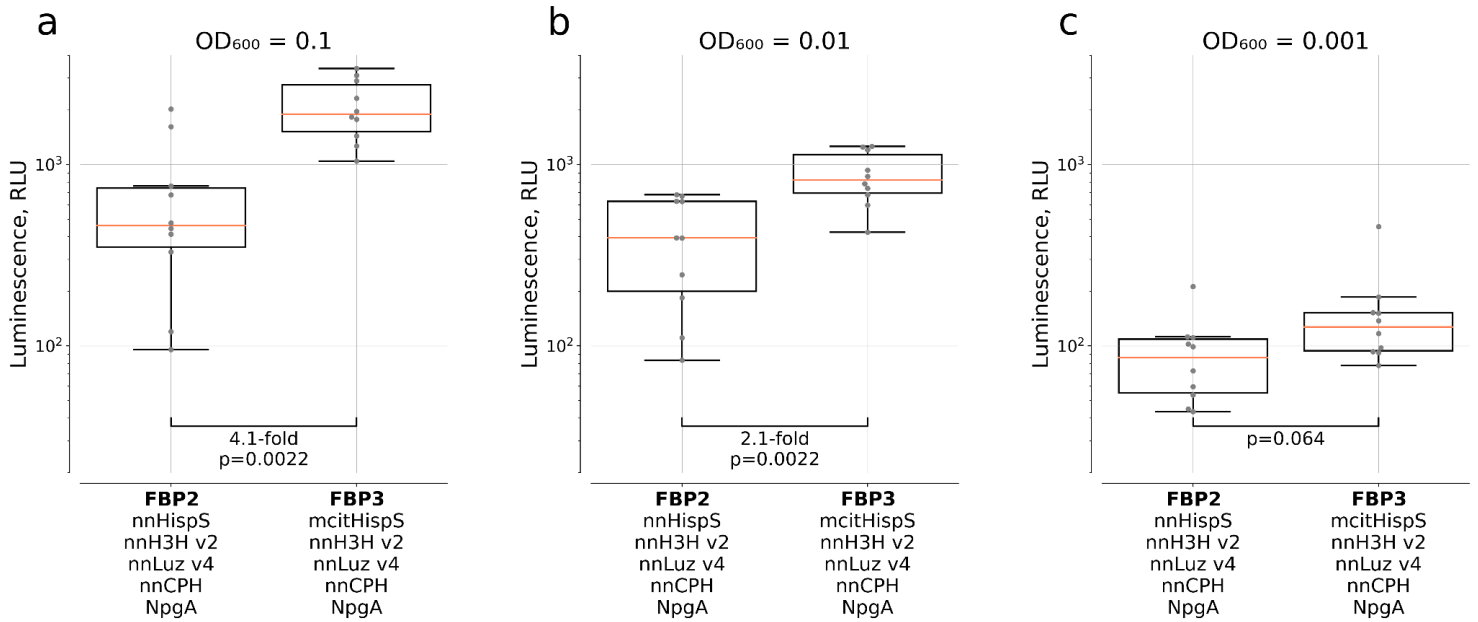

Supplementary Figure 11. Comparison of FBP2 and FBP3 pathways in *N. benthamiana* leaves infiltrated with agrobacterial suspensions of different optical densities.  $OD_{600} = 0.1$  (a), 0.01 (b) or 0.001 (c). The boxes are the first and the third quartiles, whiskers are the rest of the distribution except outliers, the orange line is the median.  $N = 10$  leaves per box plot. The difference between mean values and p-values of post-hoc two-sided Mann-Whitney U-tests are indicated below the brackets between the box plots.



HEK293NT, transient expression, after 25  $\mu$ M caffeic acid treatment

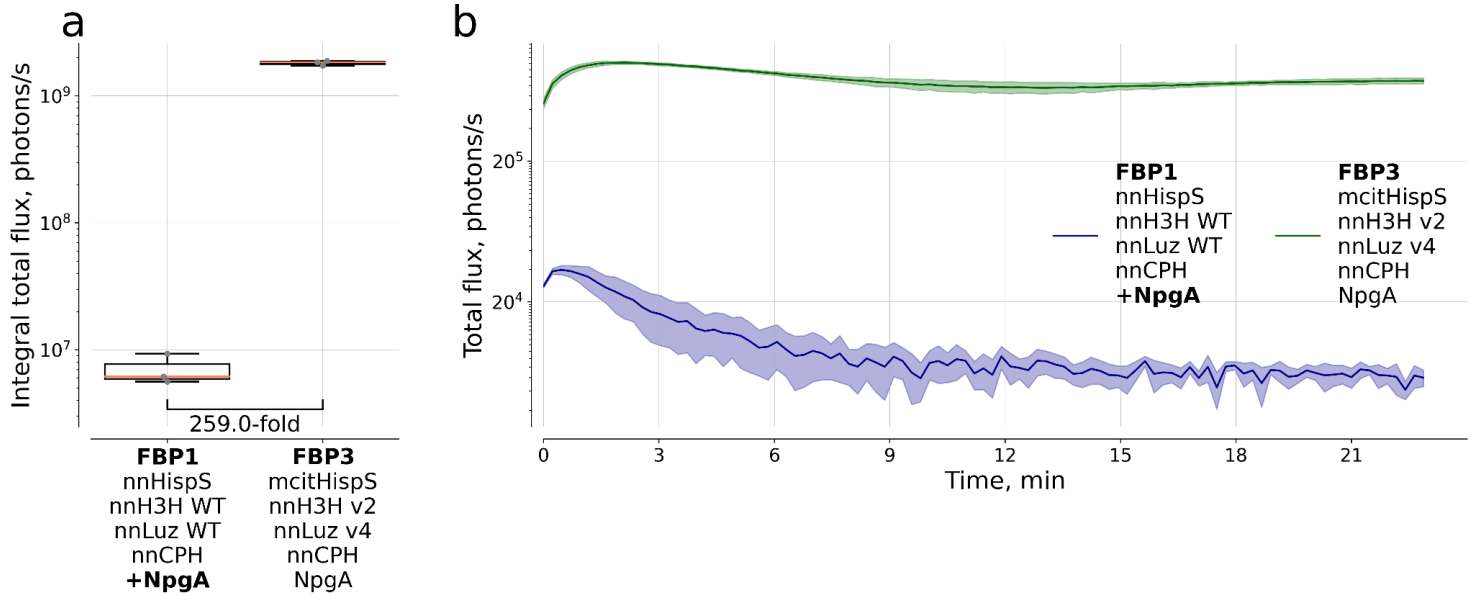

HEK293NT, transient expression, after 100  $\mu$ M caffeic acid treatment

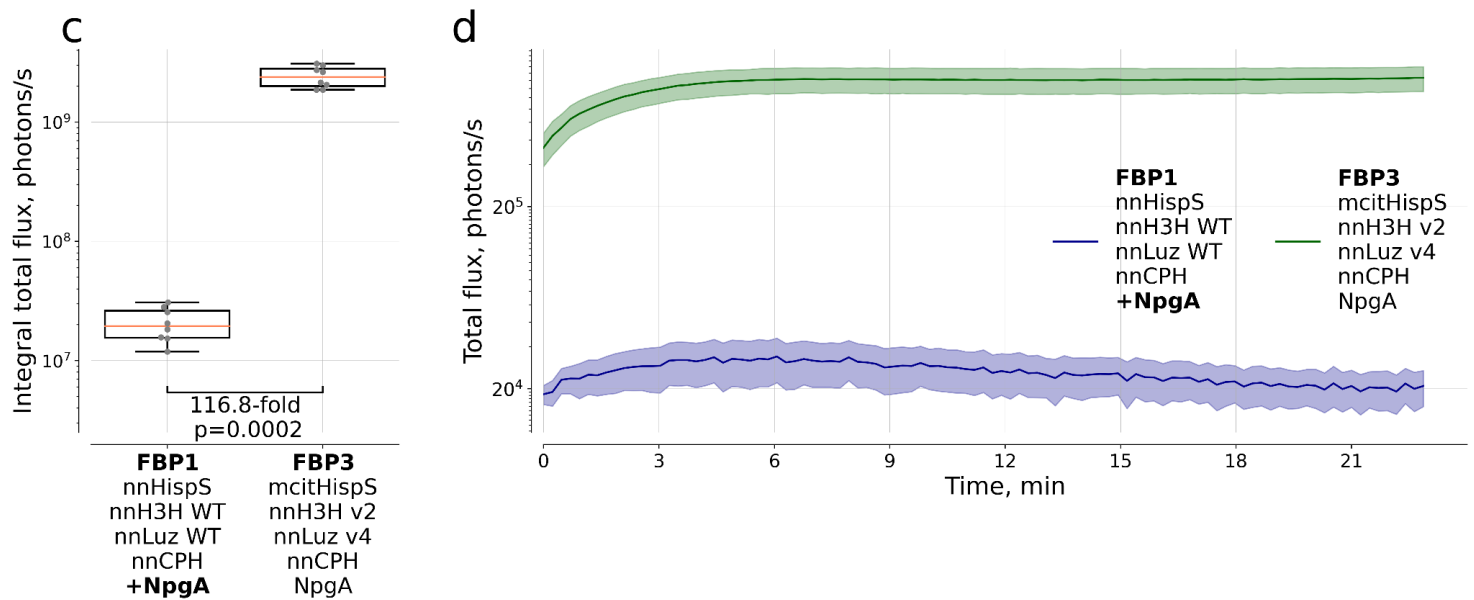

Supplementary Figure 12. FBP1 and FBP3 pathways comparison in transient expression assay in HEK293NT cells after 25  $\mu$ M (a,b) and 100  $\mu$ M (c, d) caffeic acid treatment. (a, c) Integral signal for 23 minutes. The boxes are the first and the third quartiles, whiskers are the rest of the distribution except outliers, the orange line is the median. N = 3 (a) and 8 (c) biologically independent replicates per box plot. The difference between mean values and p-values of post-hoc two-sided Mann-Whitney U-tests (if applicable) are indicated below the brackets between the box plots. (b,d) Kinetics. Data shown as mean (solid line)  $\pm$  SD (area around the solid line).

*Pichia pastoris*, stable, after 100  $\mu$ M caffeic acid treatment

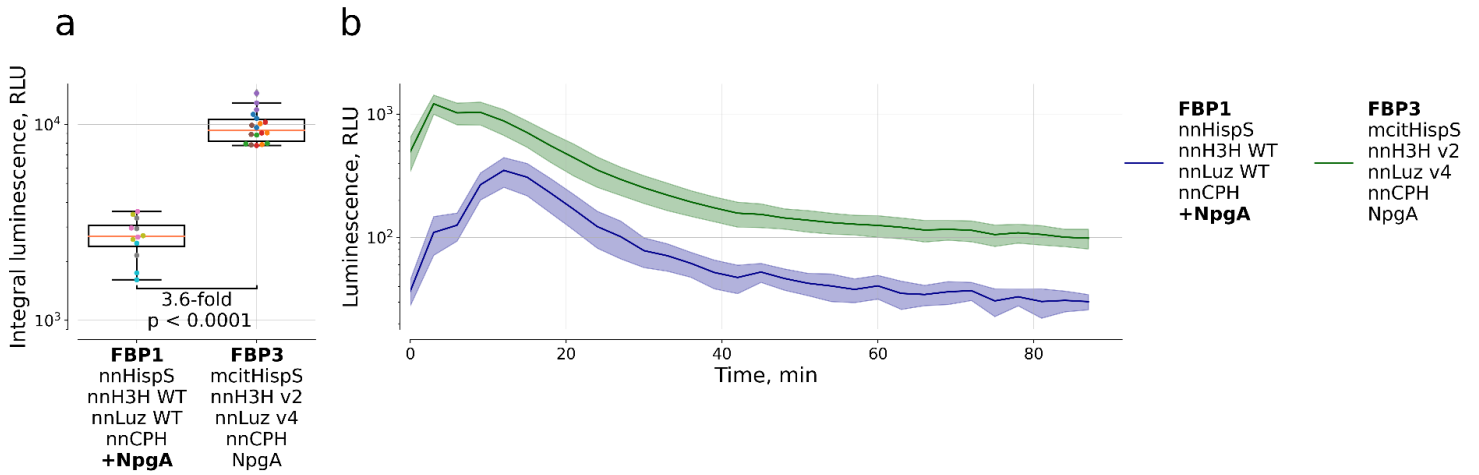

*Pichia pastoris*, stable, after 100 mM caffeic acid treatment

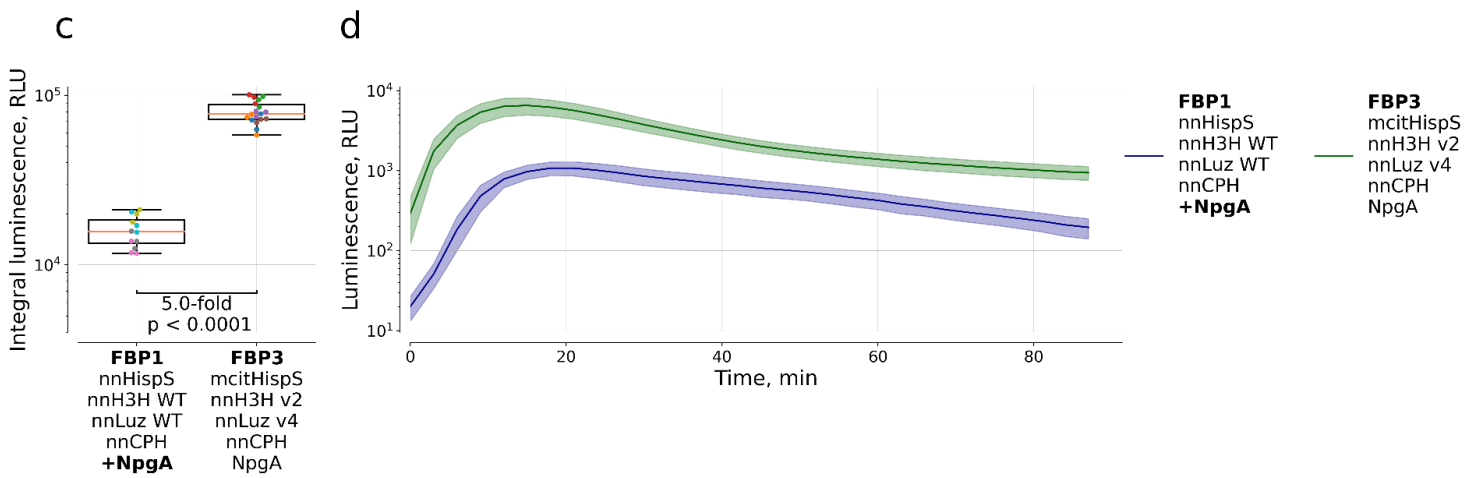

*Pichia pastoris*, stable, after 220 mM caffeic acid treatment

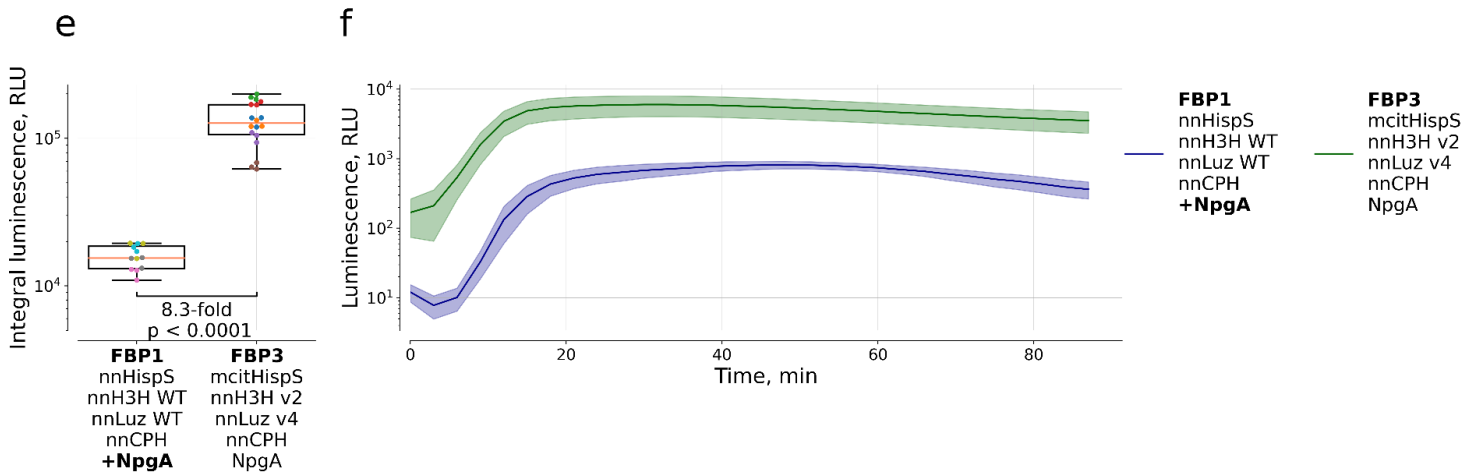

Supplementary Figure 13. The comparison of *P. pastoris* strains expressing FBP1 or FBP3 pathways after 100  $\mu$ M (a, b), 100 mM (c, d) and 220 mM (e, f) caffeic acid treatment. (a, c, e) Integral signal for 90 minutes. The boxes are the first and the third quartiles, whiskers are the rest of the distribution except outliers, the orange line is the median. The colour of data points indicates different yeast strains (4 yeast strains for FBP1 and 6 for FBP3). The difference between mean values and p-values of post-hoc two-sided Mann-Whitney U-tests are indicated below the brackets between the box plots,  $p = 5.0 \times 10^{-6}$  (a),  $p = 5.0 \times 10^{-6}$  (c),  $p = 5.0 \times 10^{-6}$  (e).  $N = 12$  or  $18$  biologically independent replicates for FBP1 or FBP3 in each panel, respectively. (b, d, f) Kinetics. Data shown as mean (solid line)  $\pm$  SD (area around the solid line).

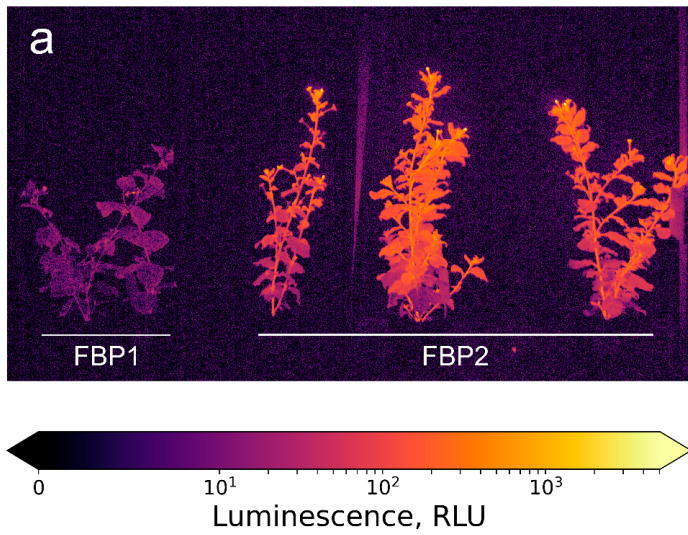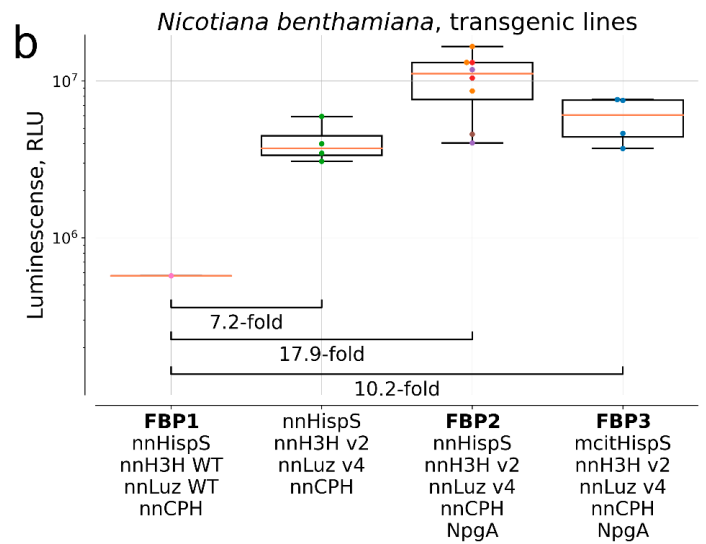

**Supplementary Figure 14. Imaging of 9-week-old transgenic *N. benthamiana*.** The FBP1 is the plant line NB021 reported in ref <sup>1</sup>. The photo, captured with ISO 400 and exposure of 30 sec (a) and integral luminescent signal from whole plants (b). It is interesting to note that when FBP1 is not co-expressed with NpgA, *N. benthamiana* plants generally produce significantly more light than *N. tabacum* plants. We interpret this as evidence of higher levels of endogenous PPTase activity in *N. benthamiana*.

The boxes are the first and the third quartiles, whiskers are the rest of the distribution except outliers, the orange line is the median. The colour of data points indicates different plant lines: 1 line for FBP1 (N = 1 plant), 1 line for nnHisps + nnH3H v2 + nnLuz v4 + nnCPH (N = 4 plants), 4 lines for FBP2 (N = 8 plants), 1 line for FBP3 (N = 4 plants). The difference between mean values is indicated below the brackets between the box plots.

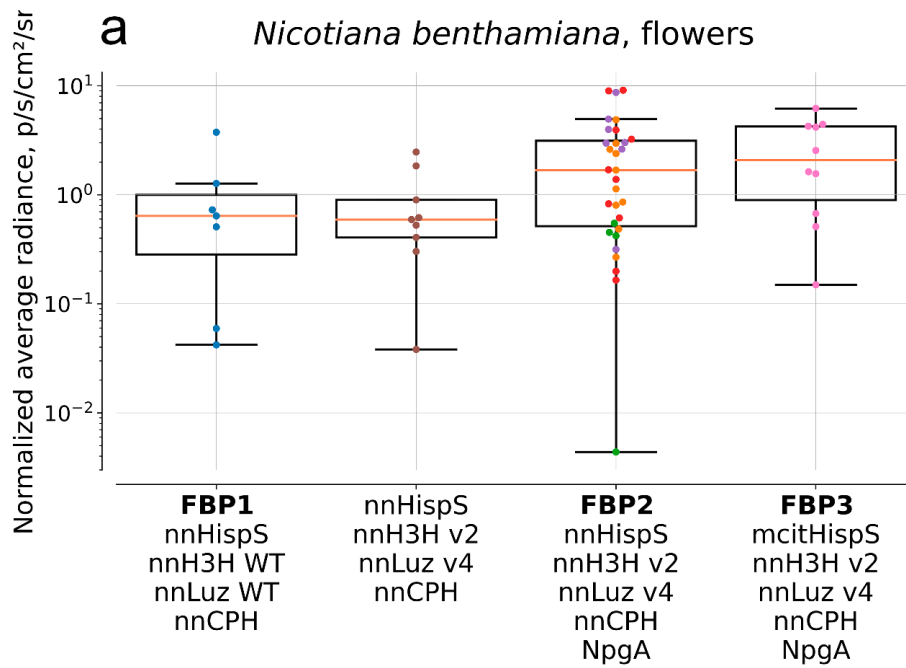

**b**

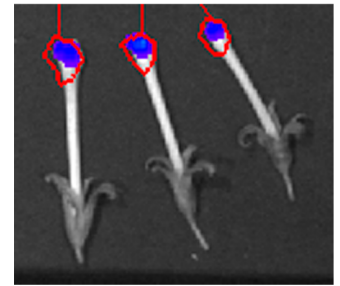

**Supplementary Figure 15. Imaging of flowers of 7-week-old transgenic *N. benthamiana*.** The FBP1 is the plant line NB021 reported in ref<sup>1</sup>. The boxes are the first and the third quartiles, whiskers are the rest of the distribution except outliers, the orange line is the median. The colour of data points indicates different plant lines: NB021 line for FBP1 (N = 7 flowers), 1 line for nnHisps + nnH3H v2 + nnLuz v4 + nnCPH (N = 9 flowers), 4 lines for FBP2 (N = 31 flowers), 1 line for FBP3 (N = 10 flowers). Kruskal-Wallis H Test: H-statistic = 6.48, p = 0.09. (c) Example of selected ROI of corona of flowers.

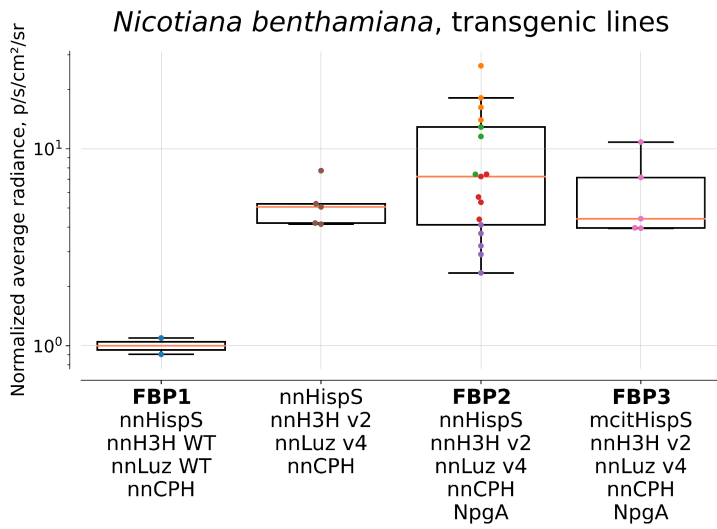

Supplementary Figure 16. Imaging of leaves taken from the top of 7-week-old transgenic *N. benthamiana*. The FBP1 is the plant line NB021 reported in ref<sup>1</sup>. The boxes are the first and the third quartiles, whiskers are the rest of the distribution except outliers, the orange line is the median. The colour of data points indicates different plant lines: NB021 line for FBP1 (N = 2 leaves), 1 line for nnHispS + nnH3H v2 + nnLuz v4 + nnCPH (N = 5 leaves), 4 lines for FBP2 (N = 17 leaves), 1 line for FBP3 (N = 5 leaves). Kruskal-Wallis H Test: H-statistic = 5.61, p = 0.13.

*Nicotiana tabacum*, transgenic lines

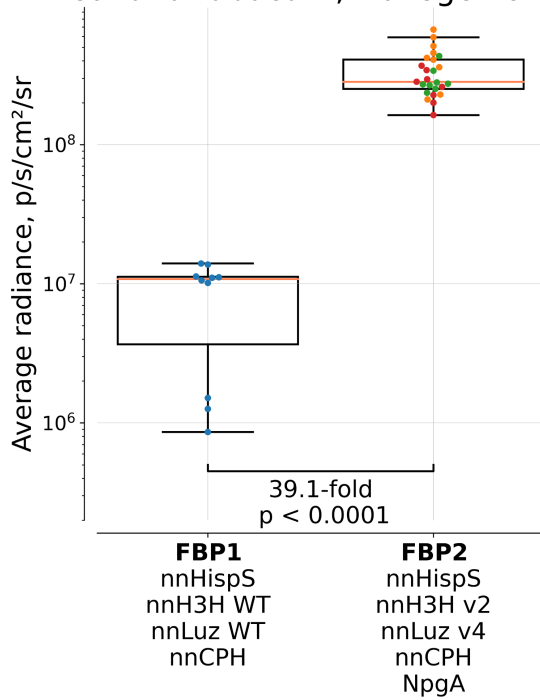

Supplementary Figure 17. Average luminescence of leaves taken from the top of 7.5-week-old *N. tabacum* expressing FBP1 or FBP2 pathways. The FBP1 is the plant line NT001 reported in ref<sup>1</sup>. The boxes are the first and the third quartiles, whiskers are the rest of the distribution except outliers, the orange line is the median. The colour of data points indicates different plant lines (FBP1 - NT001, for FBP2 - 3 lines per box plot); N = 10 or 25 leaves for FBP1 or FBP2, respectively. The difference between mean values and p-values of post-hoc two-sided Mann-Whitney U-test are indicated below the brackets between the box plots, p = 5.0e-06.

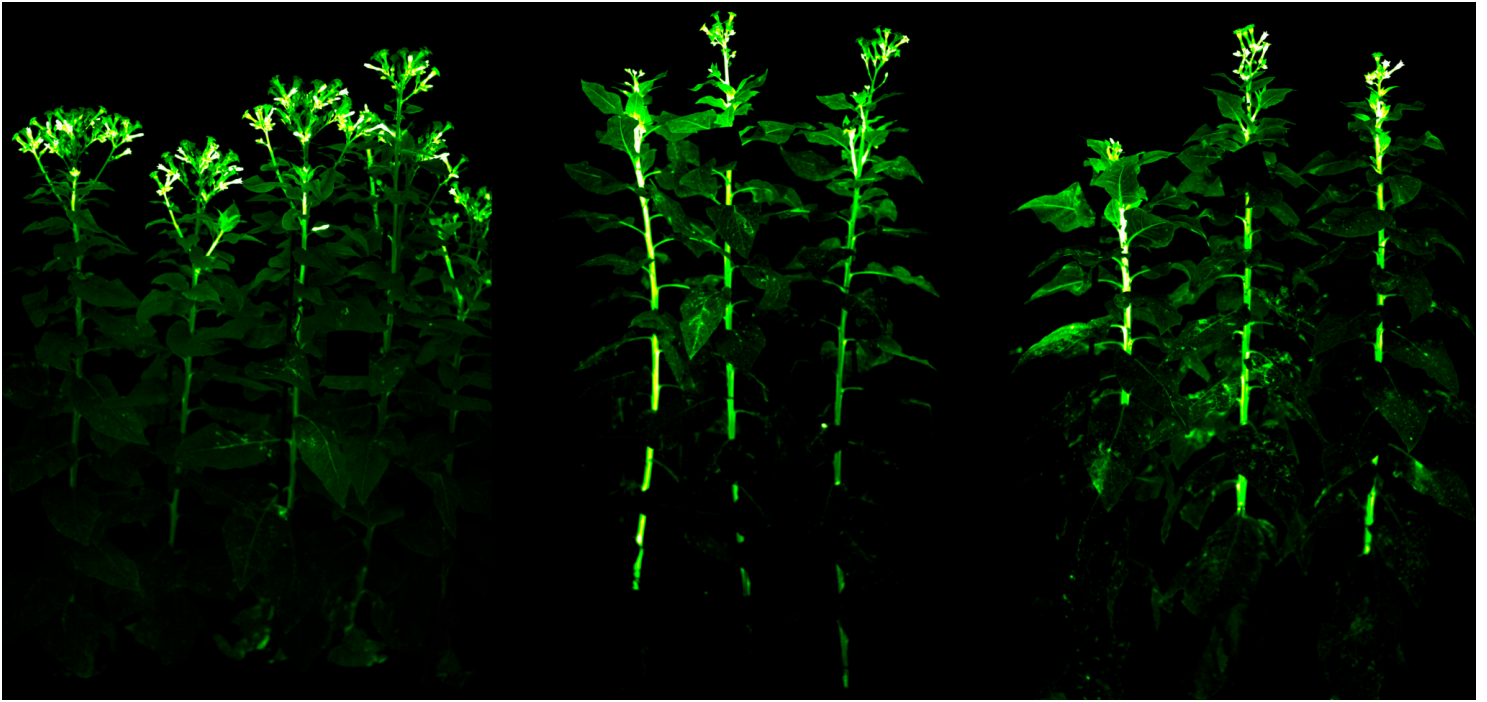

Supplementary Figure 18. Imaging of 9-week-old *N. tabacum* plants representing 3 different lines expressing FBP2 pathway. ISO 400, exposure 30 sec (see Methods).



*Populus canadensis*, transgenic lines

2-month-old

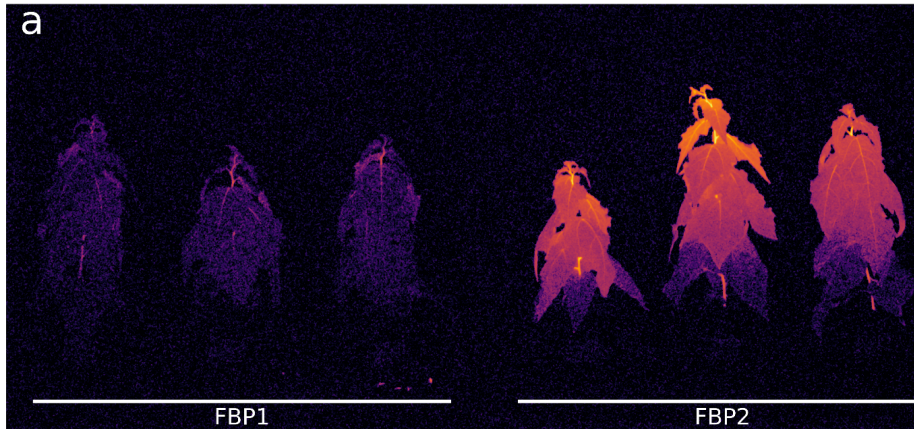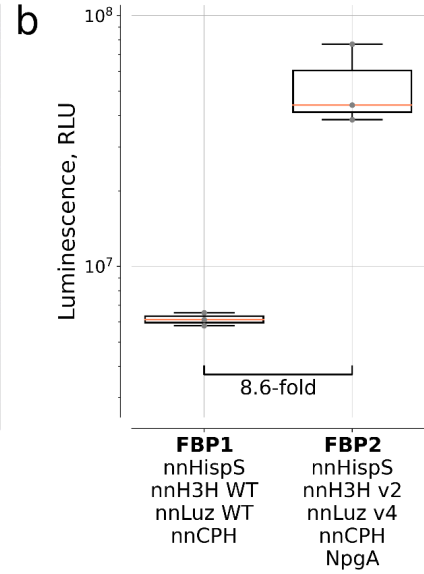

3-month-old

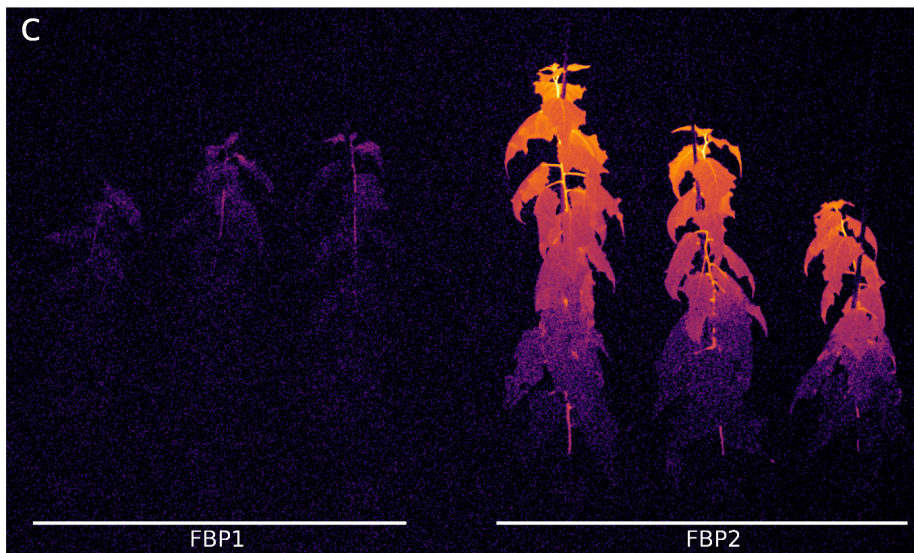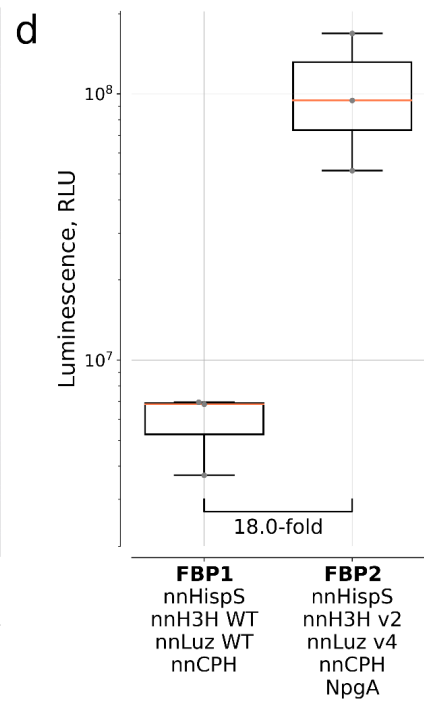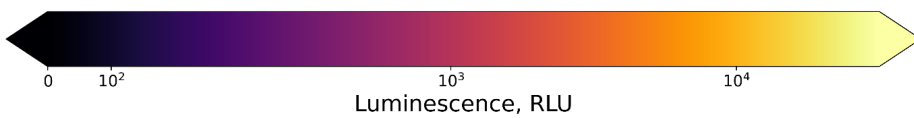

Supplementary Figure 19. Imaging of *P. canadensis* transformed with FBP1 or FBP2 pathways. The photo of 2-month-old (a) or 3-month-old plants (c) and corresponding integral luminescence signal from the whole plants (b, d). Photos were captured with ISO 20000 and exposure of 30 sec. The boxes are the first and the third quartiles, whiskers are the rest of the distribution except outliers, the orange line is the median. N = 3 plants per box plot. The difference between mean values is indicated below the brackets between the box plots.



## Arabidopsis thaliana, transgenic lines

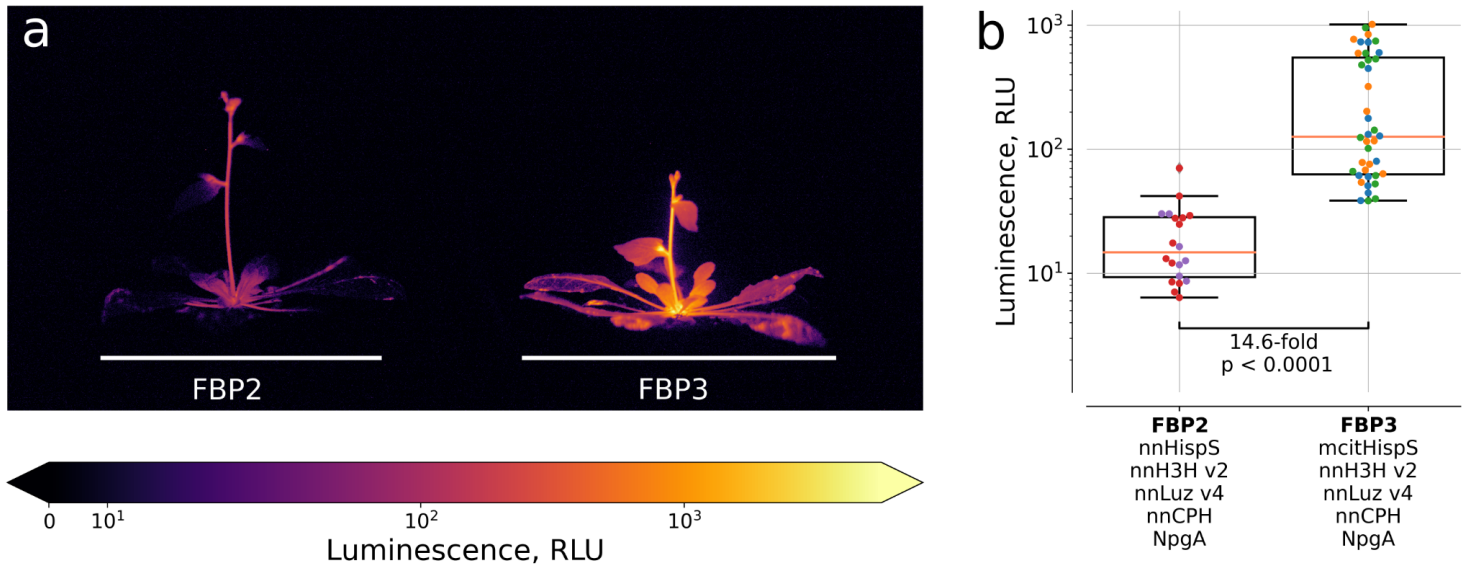

Supplementary Figure 20. Average luminescence of leaves of 6-week-old *A. thaliana* transformed with FBP2 and FBP3 pathways. The photo (ISO 400, exp - 30 sec)(a) and average luminescence of leaves(b). The boxes are the first and the third quartiles, whiskers are the rest of the distribution except outliers, the orange line is the median. The colour of data points indicates different plant lines (2 lines for FBP2, 3 lines for FBP3 per box plot); N = 20 or 40 leaves for FBP2 or FBP3, respectively. The difference between mean values and p-value of post-hoc two-sided Mann-Whitney U-test are indicated below the brackets between the box plots,  $p = 1.8e-09$ .

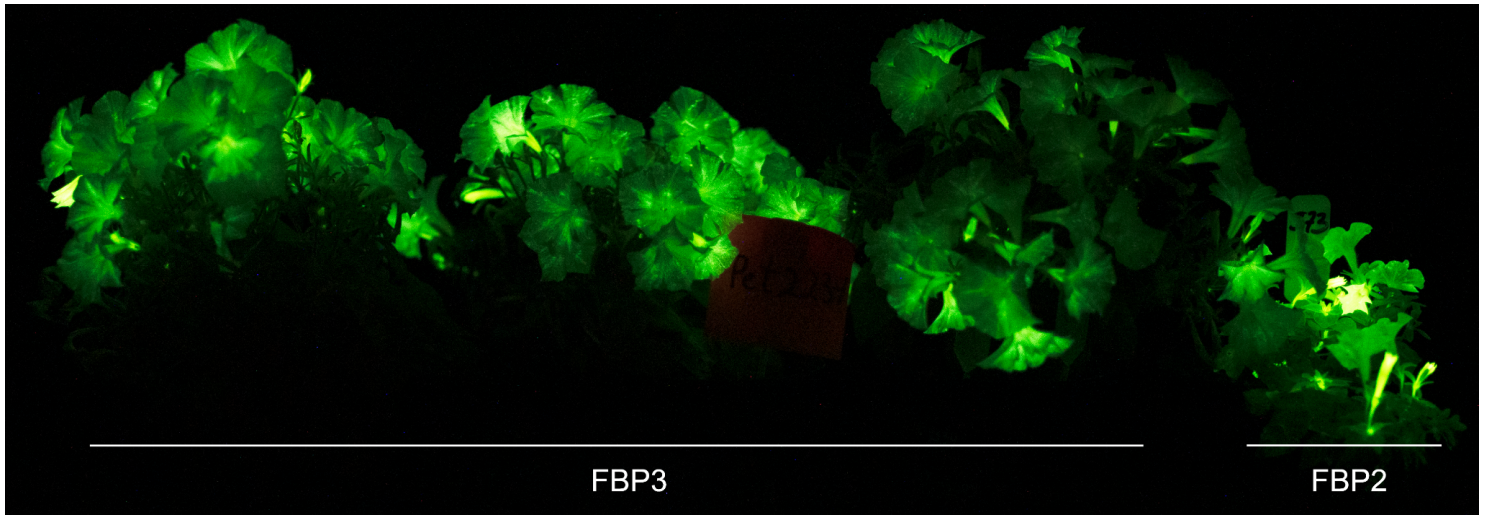

Supplementary Figure 21. Imaging of *P. hybrida* transformed with FBP2 and FBP3 pathways. ISO 3200, exposure – 30 sec.

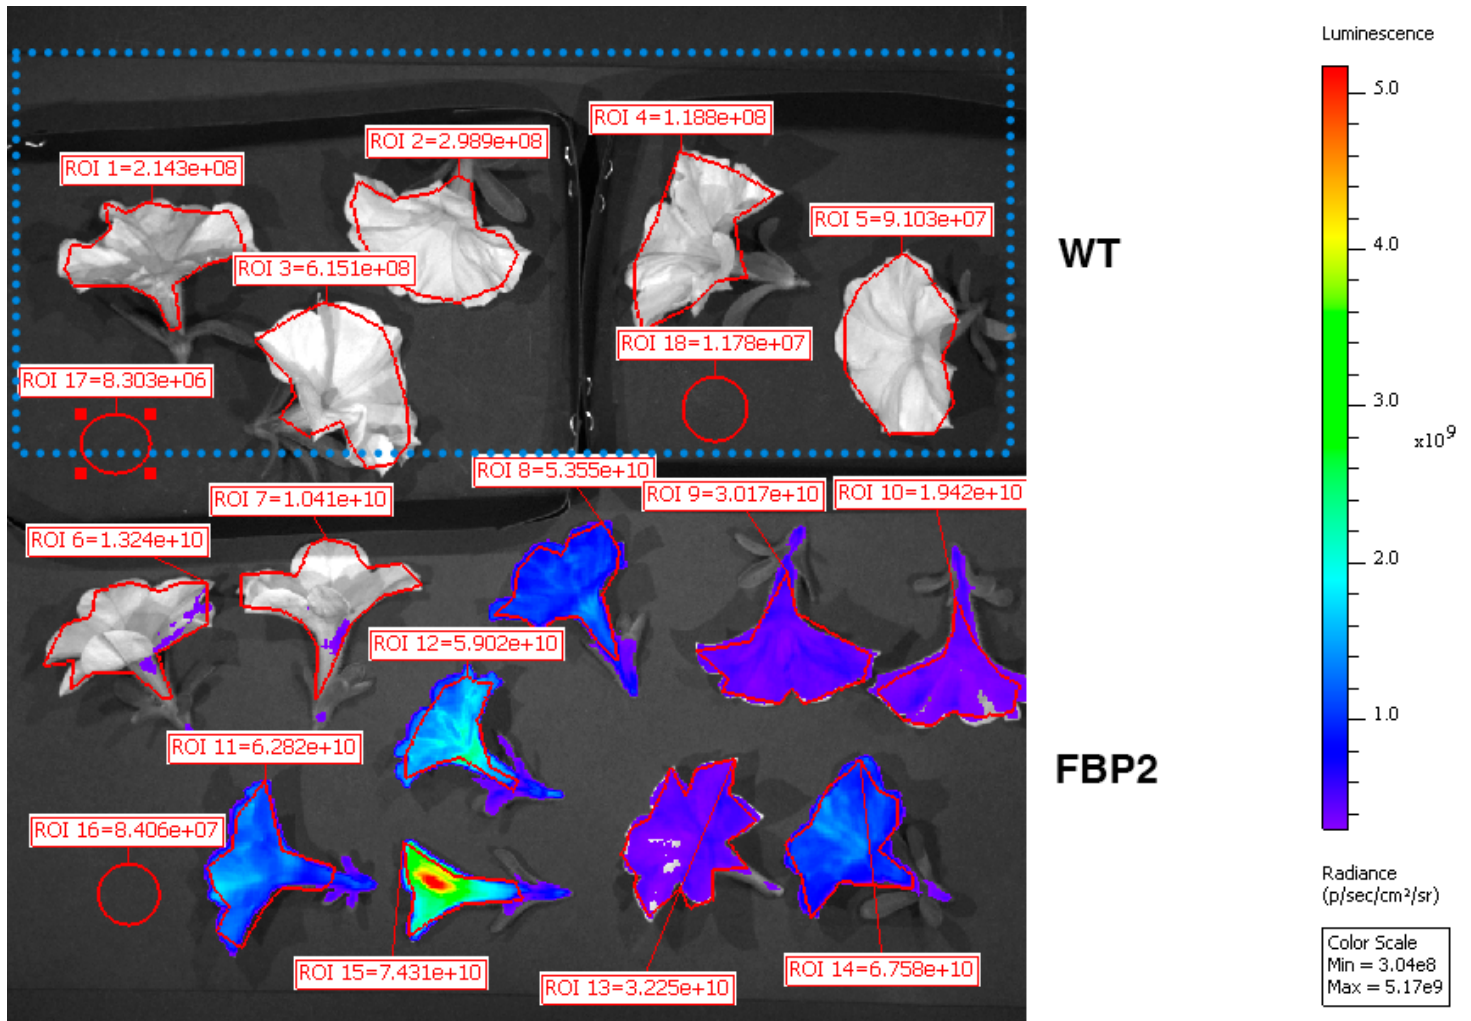

Supplementary Figure 22. Imaging of flowers of *P. hybrida* transformed with FBP2 pathway (out of the black paper box), in the black paper box - control flowers of *P. hybrida* WT, values next to ROI represent average radiance (p/s/cm<sup>2</sup>/sr).

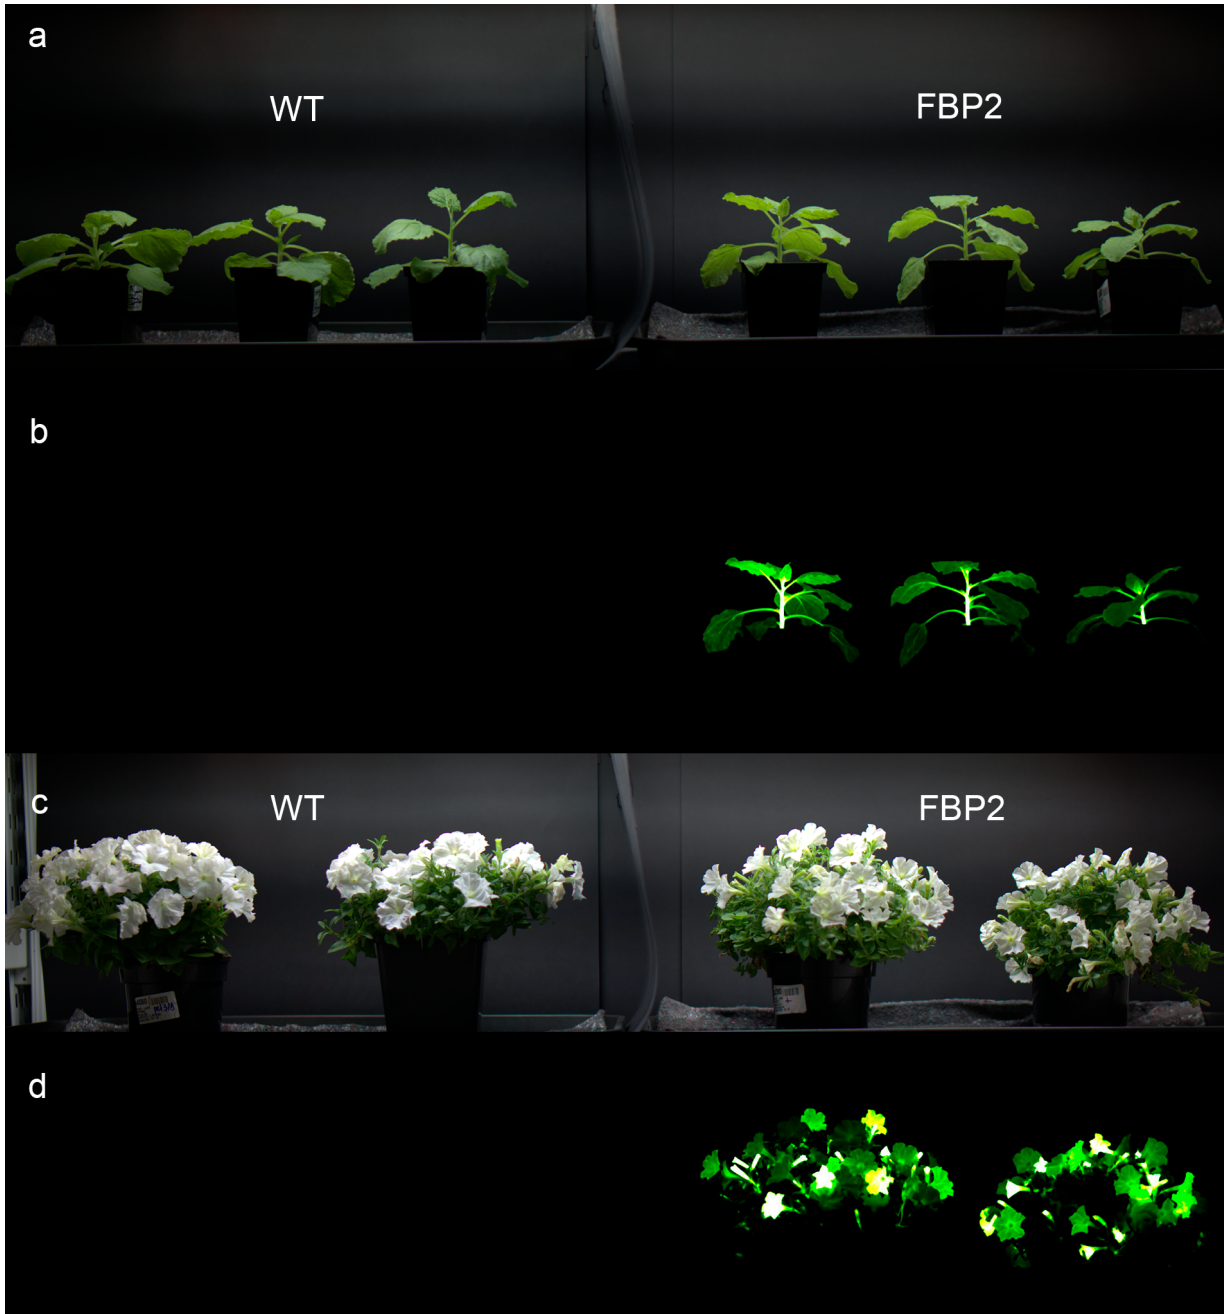

Supplementary Data Figure 23. Phenotype of glowing and wild-type *Nicotiana benthamiana* and *Petunia hybrida* plants. Potted wild-type and glowing plants of the same age in ambient light (a, c) and in the dark (b, d).

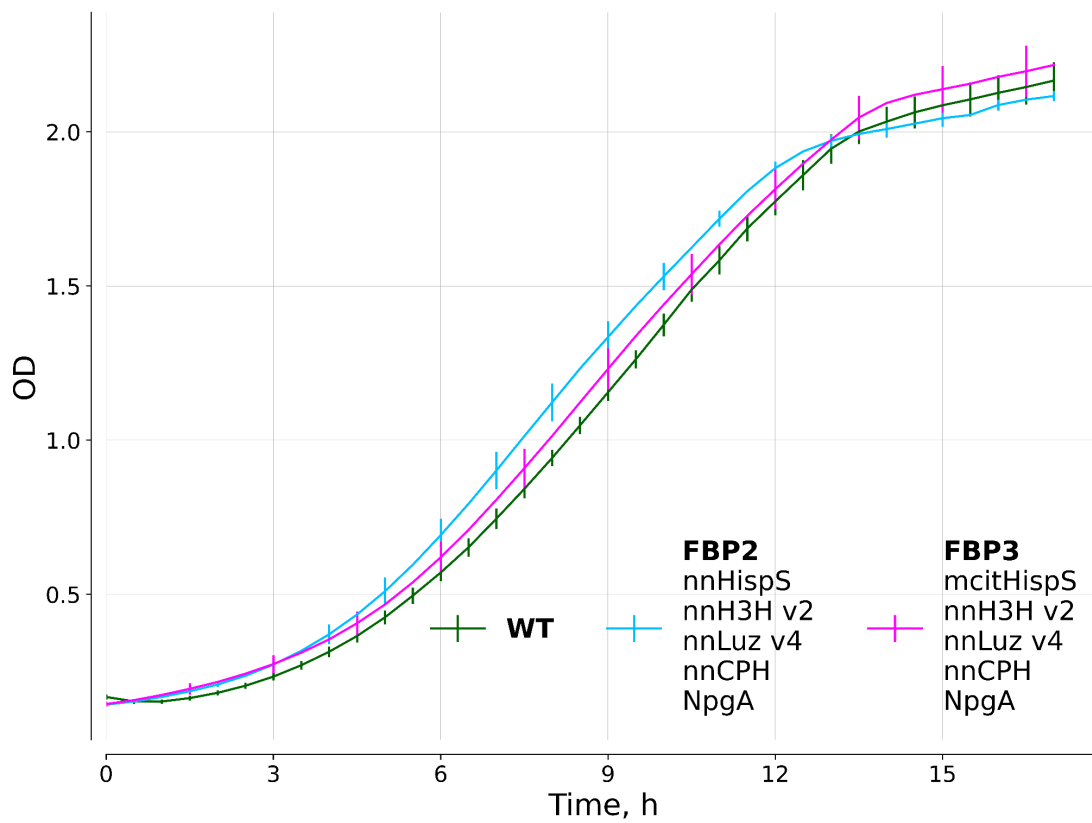

Supplementary Figure 24. The growth of the yeast strain *P. pastoris* GS115 WT and strains expressing FBP1 or FBP3 pathways. N = 1 yeast strain for WT, 1 for FBP2 and 2 yeast strains for FBP3. N = 3, 6 and 12 biologically independent replicates for WT, FBP2 and FBP3, respectively. Data shown as mean (solid line)  $\pm$  SD (whiskers).



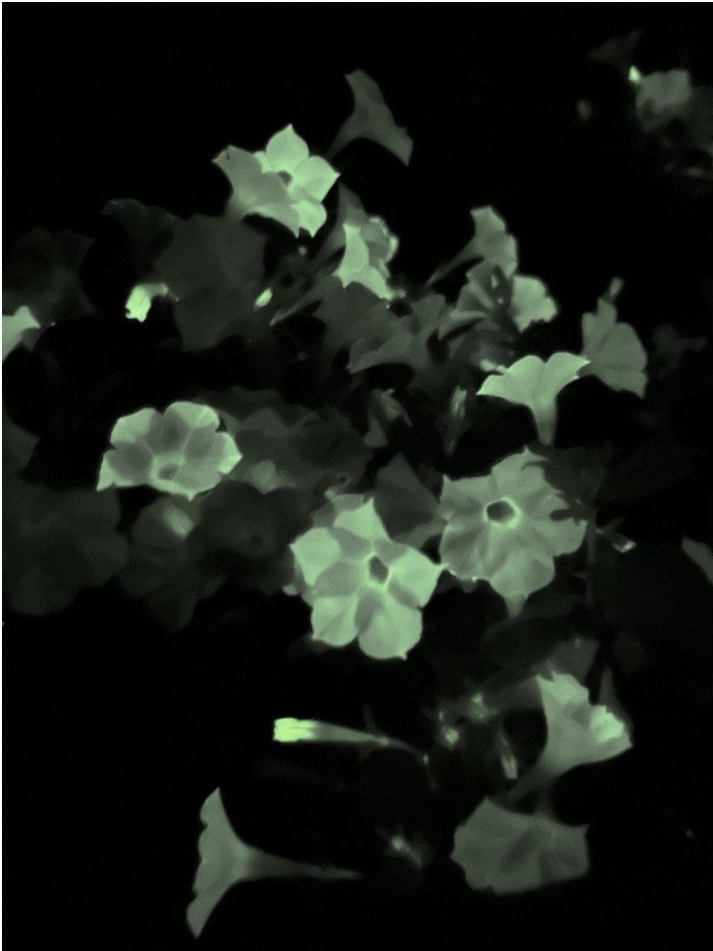

Supplementary Figure 25. A non-edited photo of FBP3-expressing T3 petunia line, shot on iPhone 14 Pro.

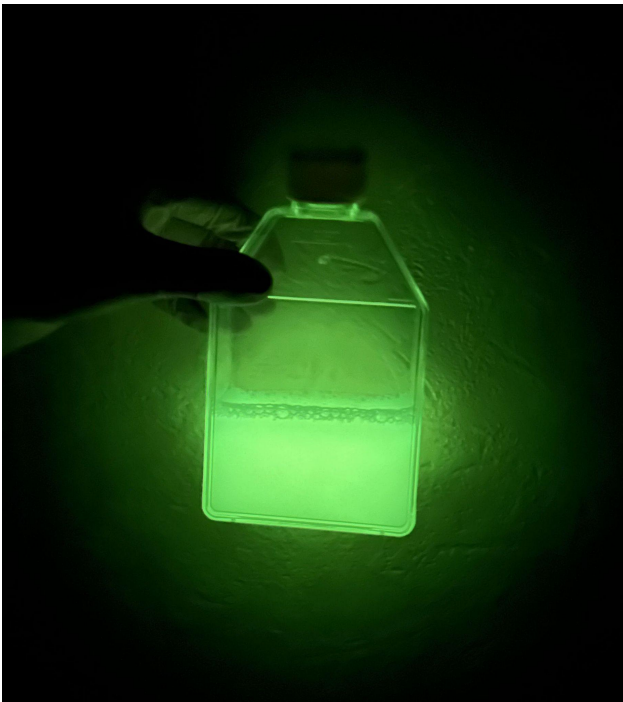

Supplementary Figure 26. A non-edited photo of FBP3-expressing yeast strain in media supplemented with caffeic-acid, shot on iPhone 14.

## Supplementary Video captions

Supplementary Video 1. A non-edited video of FBP3-expressing yeast strain in media supplemented with caffeic-acid, shot on iPhone 14. 26 frames per second, 1920x1080 px.

Supplementary Video 2. Video-rate luminescence imaging of transgenic plants expressing FBP2.

Supplementary Video 3. A non-edited video of FBP3-expressing T3 petunia line, shot on iPhone 13 Pro. 27 frames per second, 1920x1080 px.

Supplementary Table 1. Plasmids used in this study.

| Gene                                        | Plants                                                                                                                                                                                                                                                                                                                                                                                                             | HEK293NT                                                                                                                                                                     | <i>P. pastoris</i>                                                                                                                                                                       |
|---------------------------------------------|--------------------------------------------------------------------------------------------------------------------------------------------------------------------------------------------------------------------------------------------------------------------------------------------------------------------------------------------------------------------------------------------------------------------|------------------------------------------------------------------------------------------------------------------------------------------------------------------------------|------------------------------------------------------------------------------------------------------------------------------------------------------------------------------------------|
| NpgA                                        | pX131<br><a href="https://benchling.com/s/seq-j7hk6Mo26QwL2oWED3un?m=slm-HdHkCgJfryAnOv6asct4">https://benchling.com/s/seq-j7hk6Mo26QwL2oWED3un?m=slm-HdHkCgJfryAnOv6asct4</a>                                                                                                                                                                                                                                     |                                                                                                                                                                              |                                                                                                                                                                                          |
| CPH                                         | pX020<br><a href="https://benchling.com/s/seq-6LZLUoXSSOLiGcl.sf4Kh?m=slm-FYDYDjEJRJS3k5i8xCim">https://benchling.com/s/seq-6LZLUoXSSOLiGcl.sf4Kh?m=slm-FYDYDjEJRJS3k5i8xCim</a><br>Plasmid from the Ref <sup>1</sup>                                                                                                                                                                                              |                                                                                                                                                                              |                                                                                                                                                                                          |
| nnHispS                                     | bent<br>pX021<br><a href="https://benchling.com/s/seq-dgVnzNzzdb1O8UOlwsyO?m=slm-idFOm0ekAOKLIE1D6Wn8">https://benchling.com/s/seq-dgVnzNzzdb1O8UOlwsyO?m=slm-idFOm0ekAOKLIE1D6Wn8</a><br><br>pX022<br><a href="https://benchling.com/s/seq-HfeqUXOckkj1jMpb8yjl?m=slm-KGFqWOofY1Og47FNvgoW">https://benchling.com/s/seq-HfeqUXOckkj1jMpb8yjl?m=slm-KGFqWOofY1Og47FNvgoW</a><br>Plasmids from the Ref <sup>1</sup> | hum<br><a href="https://benchling.com/s/seq-byUf6AubNNzHTRvJWeNE?m=slm-ZGRq9MG6HGKrTHLR5MOP">https://benchling.com/s/seq-byUf6AubNNzHTRvJWeNE?m=slm-ZGRq9MG6HGKrTHLR5MOP</a> | ppas<br>pNK4498<br><a href="https://benchling.com/s/seq-0gFj0FeLuSEPOTReGrGi?m=slm-zpt87PSoadoe2DyTihdO">https://benchling.com/s/seq-0gFj0FeLuSEPOTReGrGi?m=slm-zpt87PSoadoe2DyTihdO</a> |
| afHispS from <i>Armillaria fuscipes</i>     | ppas/bent/hum<br>pNK6009<br><a href="https://benchling.com/s/seq-HpX0quRopNzuXCbkF5Og?m=slm-orj900TrXMnI4gONdXJF">https://benchling.com/s/seq-HpX0quRopNzuXCbkF5Og?m=slm-orj900TrXMnI4gONdXJF</a>                                                                                                                                                                                                                  |                                                                                                                                                                              |                                                                                                                                                                                          |
| agHispS from <i>Armillaria gallica</i>      | ppas/bent/hum<br>pNK2655<br><a href="https://benchling.com/s/seq-B3s5evCuyPshI06CKV74?m=slm-LfzIK93bmq7cDAJLcgSd">https://benchling.com/s/seq-B3s5evCuyPshI06CKV74?m=slm-LfzIK93bmq7cDAJLcgSd</a>                                                                                                                                                                                                                  |                                                                                                                                                                              |                                                                                                                                                                                          |
| amHispS from <i>Armillaria mellea</i>       | ppas/bent/hum<br>pNK2656<br><a href="https://benchling.com/s/seq-LDE3DqzjVztM8DqiQ0P?m=slm-9TE0Rs2JHhX2nvAUdFrT">https://benchling.com/s/seq-LDE3DqzjVztM8DqiQ0P?m=slm-9TE0Rs2JHhX2nvAUdFrT</a>                                                                                                                                                                                                                    |                                                                                                                                                                              |                                                                                                                                                                                          |
| aoHispS from <i>Armillaria ostoyae</i>      | ppas/bent/hum<br>pNK2652<br><a href="https://benchling.com/s/seq-7nLForLwJbaAC979vsFp?m=slm-UCKyNedQWh16FeOoNYeZ">https://benchling.com/s/seq-7nLForLwJbaAC979vsFp?m=slm-UCKyNedQWh16FeOoNYeZ</a>                                                                                                                                                                                                                  |                                                                                                                                                                              |                                                                                                                                                                                          |
| gnHispS from <i>Guyanagaster necrorhiza</i> | ppas/bent/hum<br>pNK2719<br><a href="https://benchling.com/s/seq-StnFUnRATVrtB8pA86S2?m=slm-iy2iuDGpOiMtNCcT25uU">https://benchling.com/s/seq-StnFUnRATVrtB8pA86S2?m=slm-iy2iuDGpOiMtNCcT25uU</a>                                                                                                                                                                                                                  |                                                                                                                                                                              |                                                                                                                                                                                          |
| mchHispS from <i>Mycena chlorophos</i>      | ppas/bent/hum<br>pNK2653<br><a href="https://benchling.com/s/seq-6CYJYzhIFKzsRPW7Rz9V?m=slm-FJDKAWwsRYmNn1htk0BL">https://benchling.com/s/seq-6CYJYzhIFKzsRPW7Rz9V?m=slm-FJDKAWwsRYmNn1htk0BL</a>                                                                                                                                                                                                                  |                                                                                                                                                                              |                                                                                                                                                                                          |
| mcitHispS from <i>Mycena citricolor</i>     | ppas/bent/hum<br>pNK2657<br><a href="https://benchling.com/s/seq-xd4LQ0hTXWIL5RMO7yqa?m=slm-HDLsqpEWOOXnf12rOno5">https://benchling.com/s/seq-xd4LQ0hTXWIL5RMO7yqa?m=slm-HDLsqpEWOOXnf12rOno5</a>                                                                                                                                                                                                                  |                                                                                                                                                                              |                                                                                                                                                                                          |
| ngHispS from <i>Neonothopanus gardneri</i>  | ppas/bent/hum<br>pNK2842<br><a href="https://benchling.com/s/seq-1M2h5oTlyutLITu1F2ai?m=slm-VA5fzuD7R0z9l6mJjqlf">https://benchling.com/s/seq-1M2h5oTlyutLITu1F2ai?m=slm-VA5fzuD7R0z9l6mJjqlf</a>                                                                                                                                                                                                                  |                                                                                                                                                                              |                                                                                                                                                                                          |
| psHispS #1 from <i>Panellus stipticus</i>   | ppas/bent/hum<br>pNK2659<br><a href="https://benchling.com/s/seq-VCK6vPdlaky1ZplEvAFI?m=slm-7rKLyhfDI3xwQysqyZ0N">https://benchling.com/s/seq-VCK6vPdlaky1ZplEvAFI?m=slm-7rKLyhfDI3xwQysqyZ0N</a>                                                                                                                                                                                                                  |                                                                                                                                                                              |                                                                                                                                                                                          |



|                                          |                                                                                                                                                                                                                                 |                                                                                                                                                                                              |                                                                                                                                                                                          |
|------------------------------------------|---------------------------------------------------------------------------------------------------------------------------------------------------------------------------------------------------------------------------------|----------------------------------------------------------------------------------------------------------------------------------------------------------------------------------------------|------------------------------------------------------------------------------------------------------------------------------------------------------------------------------------------|
| psHisP #2 from <i>Panellus stipticus</i> | ppas/bent/hum<br>pNK2660<br><a href="https://benchling.com/s/seq-1VmaBYvYwc93bfHoWYN8?m=slm-1N6afQYNHnz3xnA2hD8j">https://benchling.com/s/seq-1VmaBYvYwc93bfHoWYN8?m=slm-1N6afQYNHnz3xnA2hD8j</a>                               |                                                                                                                                                                                              |                                                                                                                                                                                          |
| nnH3H WT                                 | bent<br>pX019<br><a href="https://benchling.com/s/seq-ZVjoLQvL9ipOb0Jdx0PW?m=slm-UEsBpjNhXxwZpv9tta4E">https://benchling.com/s/seq-ZVjoLQvL9ipOb0Jdx0PW?m=slm-UEsBpjNhXxwZpv9tta4E</a><br><br>Plasmid from the Ref <sup>1</sup> | hum<br>pNK180<br><a href="https://benchling.com/s/seq-ZGuQ24Ks9ONH5OuPDrmR?m=slm-h01x8hemK2Co5EiA501V">https://benchling.com/s/seq-ZGuQ24Ks9ONH5OuPDrmR?m=slm-h01x8hemK2Co5EiA501V</a>       | ppas<br>pNK4404<br><a href="https://benchling.com/s/seq-nl9IN0MCpySO3k0Thj3P?m=slm-s5Y3vHxsDwaH7jYge0gv">https://benchling.com/s/seq-nl9IN0MCpySO3k0Thj3P?m=slm-s5Y3vHxsDwaH7jYge0gv</a> |
| nnH3H v2                                 | bent<br>pNK116<br><a href="https://benchling.com/s/seq-TVjgbAUDpSLtXwiAPO3g?m=slm-ExzXht21ELkHozzykx8B">https://benchling.com/s/seq-TVjgbAUDpSLtXwiAPO3g?m=slm-ExzXht21ELkHozzykx8B</a>                                         | hum<br>pNK189<br><a href="https://benchling.com/s/seq-L4r5kVGHb1f7hBXDCThE?m=slm-pMFOFMzgm6ge3876qxah">https://benchling.com/s/seq-L4r5kVGHb1f7hBXDCThE?m=slm-pMFOFMzgm6ge3876qxah</a>       | ppas<br>pNK4169<br><a href="https://benchling.com/s/seq-aRCkab6wDjYyXaRkdFYw?m=slm-zlyvnieVKI8rR9MrHo3v">https://benchling.com/s/seq-aRCkab6wDjYyXaRkdFYw?m=slm-zlyvnieVKI8rR9MrHo3v</a> |
| nnLuz WT                                 | bent<br>pX018<br><a href="https://benchling.com/s/seq-OJbc805At80x2L7dguDN?m=slm-FxbJkfNO6T8ibDTovi4U">https://benchling.com/s/seq-OJbc805At80x2L7dguDN?m=slm-FxbJkfNO6T8ibDTovi4U</a><br><br>Plasmid from the Ref <sup>1</sup> | ppas/hum<br>pNK5756<br><a href="https://benchling.com/s/seq-VtvFVR5UJ7K1KfrVM2qb?m=slm-5hjDOc0iqHqSRDiPzWJl">https://benchling.com/s/seq-VtvFVR5UJ7K1KfrVM2qb?m=slm-5hjDOc0iqHqSRDiPzWJl</a> |                                                                                                                                                                                          |
| nnLuz v4                                 | bent<br>pNK115<br><a href="https://benchling.com/s/seq-y3dUN4bGeogUKptVuQyK?m=slm-KBkqCwCQ64I3uPpx8C6a">https://benchling.com/s/seq-y3dUN4bGeogUKptVuQyK?m=slm-KBkqCwCQ64I3uPpx8C6a</a>                                         | ppas/hum<br>pNK845<br><a href="https://benchling.com/s/seq-aMJVqAQHeop5RyZR3hia?m=slm-ew9YhTknPhMrPNEUICof">https://benchling.com/s/seq-aMJVqAQHeop5RyZR3hia?m=slm-ew9YhTknPhMrPNEUICof</a>  |                                                                                                                                                                                          |

**Supplementary Table 2.** Plasmids for expression in mammalian cells.

| ID                                            | Plasmid description                       | Plasmid map                                                                                                                                                             |
|-----------------------------------------------|-------------------------------------------|-------------------------------------------------------------------------------------------------------------------------------------------------------------------------|
| pNK5780                                       | DVK_AF   pCMV - nnLuz WT ppas/hum - tSV40 | <a href="https://benchling.com/s/seq-9tRkFeQVsuOn2Py3DrF4?m=slm-8KKhqejiF99jNeFc0Mx">https://benchling.com/s/seq-9tRkFeQVsuOn2Py3DrF4?m=slm-8KKhqejiF99jNeFc0Mx</a>     |
| pNK5664                                       | DVK_AF   pCMV - nnLuz v4 ppas/hum - tSV40 | <a href="https://benchling.com/s/seq-szpjIEFox2RoBAzbCX12?m=slm-ihCzRTcKpFU1ZiX3PXHU">https://benchling.com/s/seq-szpjIEFox2RoBAzbCX12?m=slm-ihCzRTcKpFU1ZiX3PXHU</a>   |
| pNK294                                        | DVK_AF   pCMV - nnH3H WT hum - tSV40      | <a href="https://benchling.com/s/seq-DzJM6LiezPSHLR66y00a?m=slm-nifL6L9bWmLeokWZxID">https://benchling.com/s/seq-DzJM6LiezPSHLR66y00a?m=slm-nifL6L9bWmLeokWZxID</a>     |
| pNK291                                        | DVK_AF   pCMV - nnH3H v2 hum - tSV40      | <a href="https://benchling.com/s/seq-XBaFaZS0wkvLAYwv2xb?m=slm-YO3g3Fqr27hzRjO305Jl">https://benchling.com/s/seq-XBaFaZS0wkvLAYwv2xb?m=slm-YO3g3Fqr27hzRjO305Jl</a>     |
| pX136<br>Plasmid from<br>the Ref <sup>1</sup> | C-vector   pCMV - CPH - tSV40             | <a href="https://benchling.com/s/seq-TsINsVoYeWAlr0I8LE2B?m=slm-IK2nwHwYI62YHGfn66OL">https://benchling.com/s/seq-TsINsVoYeWAlr0I8LE2B?m=slm-IK2nwHwYI62YHGfn66OL</a>   |
| pX137<br>Plasmid from<br>the Ref <sup>1</sup> | C-vector   pCMV - npgA - tSV40            | <a href="https://benchling.com/s/seq-scdZF7tmlp3uwCvN5cq5?m=slm-Kks6Aspwz3PogvacsPy">https://benchling.com/s/seq-scdZF7tmlp3uwCvN5cq5?m=slm-Kks6Aspwz3PogvacsPy</a>     |
| pNK6006                                       | DVK_AF   pCMV - nnHisps hum - tSV40       | <a href="https://benchling.com/s/seq-VFZ8LR01nGvooM2ZpFnU?m=slm-i5txnmCnrwnLcituwEQ">https://benchling.com/s/seq-VFZ8LR01nGvooM2ZpFnU?m=slm-i5txnmCnrwnLcituwEQ</a>     |
| pNK3203                                       | DVK_AF   pCMV - mcithisps - tSV40         | <a href="https://benchling.com/s/seq-Sl4CaS08bfKDONntgU7w?m=slm-2CiaPJMFeqOFmn17jpEK">https://benchling.com/s/seq-Sl4CaS08bfKDONntgU7w?m=slm-2CiaPJMFeqOFmn17jpEK</a>   |
| pNK3205                                       | DVK_AF   pCMV - aoHisps - tSV40           | <a href="https://benchling.com/s/seq-GrSF5SUBkagxp2llhnPQ?m=slm-6LBWbRoQOW6JxSoFb60Q">https://benchling.com/s/seq-GrSF5SUBkagxp2llhnPQ?m=slm-6LBWbRoQOW6JxSoFb60Q</a>   |
| pNK3209                                       | DVK_AF   pCMV - gnHisps - tSV40           | <a href="https://benchling.com/s/seq-4x5o1iTEz6fzVanqlOPp?m=slm-RW4RC1IOF1cCNI620uWn">https://benchling.com/s/seq-4x5o1iTEz6fzVanqlOPp?m=slm-RW4RC1IOF1cCNI620uWn</a>   |
| pNK3210                                       | DVK_AF   pCMV - agHisps - tSV40           | <a href="https://benchling.com/s/seq-iVe4IVD0pIINdsP9vgHD?m=slm-OrPPzVKHs4hh8xOpz3IV">https://benchling.com/s/seq-iVe4IVD0pIINdsP9vgHD?m=slm-OrPPzVKHs4hh8xOpz3IV</a>   |
| pNK3061                                       | DVK_AF   pCMV - amHisps - tSV40           | <a href="https://benchling.com/s/seq-Thpig3qd8mE6wqF8S9IH?m=slm-7d4kin7cQpAcxWxnZJKf">https://benchling.com/s/seq-Thpig3qd8mE6wqF8S9IH?m=slm-7d4kin7cQpAcxWxnZJKf</a>   |
| pNK6009                                       | DVK_AF   pCMV - afHisps - tSV40           | <a href="https://benchling.com/s/seq-46AvNq6LGOdOUIDBUN3w?m=slm-UXc1INm2SzBdDm7kOkqR">https://benchling.com/s/seq-46AvNq6LGOdOUIDBUN3w?m=slm-UXc1INm2SzBdDm7kOkqR</a>   |
| pNK6265                                       | DVK_AF   pCMV - FFLuc - tSV40             | <a href="https://benchling.com/s/seq-7Xlv3YGxuGpSS2LwOtL1?m=slm-BAthmBp9g0mgHBNRXE9U">https://benchling.com/s/seq-7Xlv3YGxuGpSS2LwOtL1?m=slm-BAthmBp9g0mgHBNRXE9U</a>   |
| pNK6272                                       | DVK_AF   pCMV - nanoLuc - tSV40           | <a href="https://benchling.com/s/seq-hKlxkDzoUtyCV2BNSFGG?m=slm-ak5BeGANecNrrh2YBCMy">https://benchling.com/s/seq-hKlxkDzoUtyCV2BNSFGG?m=slm-ak5BeGANecNrrh2YBCMy</a>   |
| pNK6593                                       | pCIDAR   pCMV - co-iLuxA - tSV40          | <a href="https://benchling.com/s/seq-gv6bAgIxSUKo7oL6fSpC?m=slm-Qzm79rNdEhJXqfIS0wdA">https://benchling.com/s/seq-gv6bAgIxSUKo7oL6fSpC?m=slm-Qzm79rNdEhJXqfIS0wdA</a>   |
| pNK6595                                       | pCIDAR   pCMV - co-iLuxB - tSV40          | <a href="https://benchling.com/s/seq-HMiGiWoHkFY8FBW98euO?m=slm-2FSrSwfQto2PRzHxLjlf">https://benchling.com/s/seq-HMiGiWoHkFY8FBW98euO?m=slm-2FSrSwfQto2PRzHxLjlf</a>   |
| pNK6599                                       | pCIDAR   pCMV - co-iLuxC - tSV40          | <a href="https://benchling.com/s/seq-Qpxe6tYz0yodSVOdQxV2?m=slm-OKpckjebRkuwvjv09WMMK">https://benchling.com/s/seq-Qpxe6tYz0yodSVOdQxV2?m=slm-OKpckjebRkuwvjv09WMMK</a> |
| pNK6612                                       | pCIDAR   pCMV - co-iLuxD - tSV40          | <a href="https://benchling.com/s/seq-igTww6g9sStn6rNCfPIh?m=slm-eEGfZCyUnLiqxgWe89l">https://benchling.com/s/seq-igTww6g9sStn6rNCfPIh?m=slm-eEGfZCyUnLiqxgWe89l</a>     |
| pNK6604                                       | pCIDAR   pCMV - co-iLuxE - tSV40          | <a href="https://benchling.com/s/seq-CLqFGnVM6M6SmYjN3UUG?m=slm-JSqj8xAqU8BNcmVf3S1j">https://benchling.com/s/seq-CLqFGnVM6M6SmYjN3UUG?m=slm-JSqj8xAqU8BNcmVf3S1j</a>   |

|         |                             |                                                                                                                                                                       |
|---------|-----------------------------|-----------------------------------------------------------------------------------------------------------------------------------------------------------------------|
| pNK6614 | pCIDAR   pCMV - frp - tSV40 | <a href="https://benchling.com/s/seg-R23icci4Bl8jYpD6GdTX?m=slm-FMb8Ll5vgoUsUxeBil2t">https://benchling.com/s/seg-R23icci4Bl8jYpD6GdTX?m=slm-FMb8Ll5vgoUsUxeBil2t</a> |
|---------|-----------------------------|-----------------------------------------------------------------------------------------------------------------------------------------------------------------------|

Supplementary Table 3. Plasmids for expression in *P. pastoris*.

| ID      | Plasmid description         | Plasmid map                                                                                                                                                             |
|---------|-----------------------------|-------------------------------------------------------------------------------------------------------------------------------------------------------------------------|
| pNK1508 | pGAP-Hyg   NpgA             | <a href="https://benchling.com/s/seq-wSZV0ADJQVfKbmbkxI0Y?m=slm-sq6RcovW5i00rsL5RbWt">https://benchling.com/s/seq-wSZV0ADJQVfKbmbkxI0Y?m=slm-sq6RcovW5i00rsL5RbWt</a>   |
| pNK5869 | pGAP-Z   nnHispS            | <a href="https://benchling.com/s/seq-8YnNqUjSobFUjkreIKNu?m=slm-RUJJJdkJIV0g1aTaV5D9m">https://benchling.com/s/seq-8YnNqUjSobFUjkreIKNu?m=slm-RUJJJdkJIV0g1aTaV5D9m</a> |
| pNK3293 | pGAP-Z   afHispS            | <a href="https://benchling.com/s/seq-4ifheFWnNITRMyl1PwWTP?m=slm-dyPZ8ct3kU3f2Fezqz4C">https://benchling.com/s/seq-4ifheFWnNITRMyl1PwWTP?m=slm-dyPZ8ct3kU3f2Fezqz4C</a> |
| pNK5871 | pGAP-Z   agHispS            | <a href="https://benchling.com/s/seq-08n0A9ZKqB7yHbllNZef?m=slm-oz7B27p56mnio4h6l3op">https://benchling.com/s/seq-08n0A9ZKqB7yHbllNZef?m=slm-oz7B27p56mnio4h6l3op</a>   |
| pNK5889 | pGAP-Z   amHispS            | <a href="https://benchling.com/s/seq-sfMSGdiOivMc2ryRTMaw?m=slm-czE8bLlmiHfq03xIGN1j">https://benchling.com/s/seq-sfMSGdiOivMc2ryRTMaw?m=slm-czE8bLlmiHfq03xIGN1j</a>   |
| pNK5913 | pGAP-Z   aoHispS            | <a href="https://benchling.com/s/seq-thvcdYtpRkUrBoZue81q?m=slm-TBlqYJmPQSVJONDxGVuU">https://benchling.com/s/seq-thvcdYtpRkUrBoZue81q?m=slm-TBlqYJmPQSVJONDxGVuU</a>   |
| pNK3292 | pGAP-Z   gnHispS            | <a href="https://benchling.com/s/seq-u8RO6pOdToKTUezy0tNp?m=slm-rzF6lQODcZhEocnRlfn">https://benchling.com/s/seq-u8RO6pOdToKTUezy0tNp?m=slm-rzF6lQODcZhEocnRlfn</a>     |
| pNK3287 | pGAP-Z   mchHispS           | <a href="https://benchling.com/s/seq-2Rum32em3qllcnp2fHOA?m=slm-vN5VBNmZLjkLobrLTrIE">https://benchling.com/s/seq-2Rum32em3qllcnp2fHOA?m=slm-vN5VBNmZLjkLobrLTrIE</a>   |
| pNK5867 | pGAP-Z   mcitHispS          | <a href="https://benchling.com/s/seq-lVcfX0nBxssWmeqXvt4p?m=slm-xcpaq3j8GRPGql_4HeaPq">https://benchling.com/s/seq-lVcfX0nBxssWmeqXvt4p?m=slm-xcpaq3j8GRPGql_4HeaPq</a> |
| pNK3222 | pGAP-Z   ngHispS            | <a href="https://benchling.com/s/seq-MTitklOHQIMVTPaDI0J2?m=slm-jhVXTYbOYKaiAulldHK4">https://benchling.com/s/seq-MTitklOHQIMVTPaDI0J2?m=slm-jhVXTYbOYKaiAulldHK4</a>   |
| pNK3017 | pGAP-Z   psHispS #1         | <a href="https://benchling.com/s/seq-TXzLZk0INjCNEIKCzDFw?m=slm-appoL_NampXAJ4zTUW0Xn">https://benchling.com/s/seq-TXzLZk0INjCNEIKCzDFw?m=slm-appoL_NampXAJ4zTUW0Xn</a> |
| pNK3019 | pGAP-Z   psHispS #2         | <a href="https://benchling.com/s/seq-F4vpXaWNjX1JIVko5gf7?m=slm-OpJMfSwnxB4zgdPGuB66">https://benchling.com/s/seq-F4vpXaWNjX1JIVko5gf7?m=slm-OpJMfSwnxB4zgdPGuB66</a>   |
| pNK5709 | pGAP-Hyg   nnH3H WT         | <a href="https://benchling.com/s/seq-01lxHpymMnUomzl3TZ4E?m=slm-tn4sNABx3A5f0dh01DFq">https://benchling.com/s/seq-01lxHpymMnUomzl3TZ4E?m=slm-tn4sNABx3A5f0dh01DFq</a>   |
| pNK5712 | pGAP-Hyg   nnH3H v2         | <a href="https://benchling.com/s/seq-7tWRDMIL0skZFAMTJpEW?m=slm-1R8J6U1iC3NIMvznk5lu">https://benchling.com/s/seq-7tWRDMIL0skZFAMTJpEW?m=slm-1R8J6U1iC3NIMvznk5lu</a>   |
| pNK5788 | pGAP-Kan   nnLuz WT         | <a href="https://benchling.com/s/seq-7CxEVTT20bRKNS3m6yM8?m=slm-61XdsunkiFEZRFMTNEo">https://benchling.com/s/seq-7CxEVTT20bRKNS3m6yM8?m=slm-61XdsunkiFEZRFMTNEo</a>     |
| pNK5785 | pGAP-Kan   nnLuz v4         | <a href="https://benchling.com/s/seq-UuMufCjCBXGciWrr2IG2?m=slm-OW3bR80rxCmEdPJaoJr9">https://benchling.com/s/seq-UuMufCjCBXGciWrr2IG2?m=slm-OW3bR80rxCmEdPJaoJr9</a>   |
| pNK6624 | pGAP-Hyg   nnLuz WT - HiBiT | <a href="https://benchling.com/s/seq-Amwp8L7rUC8h5RuCcu6V?m=slm-l8TtpZ0t5p5S.JN1Zpxbf">https://benchling.com/s/seq-Amwp8L7rUC8h5RuCcu6V?m=slm-l8TtpZ0t5p5S.JN1Zpxbf</a> |
| pNK996  | pGAP-Hyg   nnLuz v4 - HiBiT | <a href="https://benchling.com/s/seq-HXE8ZVTGkGFG8I0ci6Uc?m=slm-8lTOVDp1czXYE4v8tg7N">https://benchling.com/s/seq-HXE8ZVTGkGFG8I0ci6Uc?m=slm-8lTOVDp1czXYE4v8tg7N</a>   |

Supplementary Table 4. Plasmids for expression in plants.

| ID      | Plasmid description                     | Plasmid map                                                                                                                                                           |
|---------|-----------------------------------------|-----------------------------------------------------------------------------------------------------------------------------------------------------------------------|
| pN094   | Level 1   p35s - NpgA - tOCS            | <a href="https://benchling.com/s/seq-o1FM7PTx7f1izd0G5Zte?m=slm-Jtuehn5Ny7J7hoaUjYQZ">https://benchling.com/s/seq-o1FM7PTx7f1izd0G5Zte?m=slm-Jtuehn5Ny7J7hoaUjYQZ</a> |
| pNK077  | Level 1   pCmYLCV - NpgA - tATP         | <a href="https://benchling.com/s/seq-Pru2MS278Nrr7yxjNQBK?m=slm-txwiWQz5LC3quw08eTel">https://benchling.com/s/seq-Pru2MS278Nrr7yxjNQBK?m=slm-txwiWQz5LC3quw08eTel</a> |
| pX028   | Level 1   p35s - nnHisps - tOCS         | <a href="https://benchling.com/s/seq-PigSpOXySuN3KAXDS4dp?m=slm-4KWYBc2Yib5mOyflX6z6">https://benchling.com/s/seq-PigSpOXySuN3KAXDS4dp?m=slm-4KWYBc2Yib5mOyflX6z6</a> |
| pNK2714 | Level 1   p35s - mcitHisps - tOCS       | <a href="https://benchling.com/s/seq-OTdGulhG7uBSySd06gMy?m=slm-5GhfWLPdsw4YcJ5tad2D">https://benchling.com/s/seq-OTdGulhG7uBSySd06gMy?m=slm-5GhfWLPdsw4YcJ5tad2D</a> |
| pNK2748 | Level 1   p35s - gnHisps - tOCS         | <a href="https://benchling.com/s/seq-NxvVsys9zCAFolkKhApg?m=slm-PB4MJ2q1q1oaChmNrnj4">https://benchling.com/s/seq-NxvVsys9zCAFolkKhApg?m=slm-PB4MJ2q1q1oaChmNrnj4</a> |
| pNK5739 | Level 1   p35s - afHisps - tOCS         | <a href="https://benchling.com/s/seq-co3aAC8InccrH6PLg6ao?m=slm-YjFuVC00C0dBatCFGog8">https://benchling.com/s/seq-co3aAC8InccrH6PLg6ao?m=slm-YjFuVC00C0dBatCFGog8</a> |
| pNK2674 | Level 1   p35s - aoHisps - tOCS         | <a href="https://benchling.com/s/seq-4QYpwefWZvmOhWBtxGya?m=slm-axGMB89CJrSpn9pO8NP5">https://benchling.com/s/seq-4QYpwefWZvmOhWBtxGya?m=slm-axGMB89CJrSpn9pO8NP5</a> |
| pNK2711 | Level 1   p35s - agHisps - tOCS         | <a href="https://benchling.com/s/seq-FHSP8wG3lmlLj1fbh3Sl?m=slm-5wOHQUJA3FHZdkrL8btD">https://benchling.com/s/seq-FHSP8wG3lmlLj1fbh3Sl?m=slm-5wOHQUJA3FHZdkrL8btD</a> |
| pNK2816 | Level 1   p35s - amHisps - tOCS         | <a href="https://benchling.com/s/seq-6wllrkjhFRYO4wkBfDVU?m=slm-hOWhMPCl500AjtHHjeWV">https://benchling.com/s/seq-6wllrkjhFRYO4wkBfDVU?m=slm-hOWhMPCl500AjtHHjeWV</a> |
| pNK2715 | Level 1   p35s - psHisps #1 - tOCS      | <a href="https://benchling.com/s/seq-8GEGPbckUqblDANTIVhQ?m=slm-vzz7g32kx8Nbs5xngO6">https://benchling.com/s/seq-8GEGPbckUqblDANTIVhQ?m=slm-vzz7g32kx8Nbs5xngO6</a>   |
| pNK2716 | Level 1   p35s - psHisps #2 - tOCS      | <a href="https://benchling.com/s/seq-KzI5qzOPg8jkd8edxE7J?m=slm-hYP8T6y9ml8SHIDBE2gC">https://benchling.com/s/seq-KzI5qzOPg8jkd8edxE7J?m=slm-hYP8T6y9ml8SHIDBE2gC</a> |
| pNK2857 | Level 1   p35s - ngHisps - tOCS         | <a href="https://benchling.com/s/seq-Ca00IIPJ46K8FZ0l0Fwd?m=slm-HhAV8lhpaKtZiFjiE02">https://benchling.com/s/seq-Ca00IIPJ46K8FZ0l0Fwd?m=slm-HhAV8lhpaKtZiFjiE02</a>   |
| pNK2676 | Level 1   p35s - mchlHisps - tOCS       | <a href="https://benchling.com/s/seq-PEYW7vARjkcANQjioo6?m=slm-W1J3vqyauF5ycDGgBNL">https://benchling.com/s/seq-PEYW7vARjkcANQjioo6?m=slm-W1J3vqyauF5ycDGgBNL</a>     |
| pNK093  | Level 1   pFMV - nnH3H WT - tNOS        | <a href="https://benchling.com/s/seq-DnBkfiWoak29sqieFLof?m=slm-U5OjKtgT09Z9dMdlClrw">https://benchling.com/s/seq-DnBkfiWoak29sqieFLof?m=slm-U5OjKtgT09Z9dMdlClrw</a> |
| pNK156  | Level 1   pFMV - nnH3H v2 - tNOS        | <a href="https://benchling.com/s/seq-j5jkkjuRK5VNLsbXtGp?m=slm-aFvsHms19B6JefbsmpoG">https://benchling.com/s/seq-j5jkkjuRK5VNLsbXtGp?m=slm-aFvsHms19B6JefbsmpoG</a>   |
| pNK5668 | Level 1   p35s - nnLuz WT - tAct2       | <a href="https://benchling.com/s/seq-ikgdQelPsEaWW9MUfwc2?m=slm-6lli6zm0m4eWaNoON453">https://benchling.com/s/seq-ikgdQelPsEaWW9MUfwc2?m=slm-6lli6zm0m4eWaNoON453</a> |
| pNK155  | Level 1   p35s - nnLuz v4 - tAct2       | <a href="https://benchling.com/s/seq-JHhqKcFYX05LiRKLlTaa?m=slm-YYutXmSCiqovJHglSB1">https://benchling.com/s/seq-JHhqKcFYX05LiRKLlTaa?m=slm-YYutXmSCiqovJHglSB1</a>   |
| pX030   | Level 1   p35s - nnCPH - tOCS           | <a href="https://benchling.com/s/seq-7XBDGX8yci30y36lnhGw?m=slm-76s6l2kobMN6e46mKQkd">https://benchling.com/s/seq-7XBDGX8yci30y36lnhGw?m=slm-76s6l2kobMN6e46mKQkd</a> |
| pNK6260 | Level 1   p35s(0.4 kb) - FFLuc - tOCS   | <a href="https://benchling.com/s/seq-rLXcKcvdkt8DpM9o7Xcq?m=slm-oEP8R0c7iWC65YScfAIF">https://benchling.com/s/seq-rLXcKcvdkt8DpM9o7Xcq?m=slm-oEP8R0c7iWC65YScfAIF</a> |
| pNK6269 | Level 1   p35s(0.4 kb) - nanoLuc - tOCS | <a href="https://benchling.com/s/seq-BKRLDkmTAUWRNmfBmHUj?m=slm-SCGfQZMUgicllOxp4sC4">https://benchling.com/s/seq-BKRLDkmTAUWRNmfBmHUj?m=slm-SCGfQZMUgicllOxp4sC4</a> |
| pNK6357 | Level 1   p35s(0.4 kb) - iLuxA - tOCS   | <a href="https://benchling.com/s/seq-5Whqyp9xxIKYwcy7IK4X?m=slm-Mqowq7sYFAWAZauGiMon">https://benchling.com/s/seq-5Whqyp9xxIKYwcy7IK4X?m=slm-Mqowq7sYFAWAZauGiMon</a> |

|         |                                                                                                                                                                                                              |                                                                                                                                                                         |
|---------|--------------------------------------------------------------------------------------------------------------------------------------------------------------------------------------------------------------|-------------------------------------------------------------------------------------------------------------------------------------------------------------------------|
| pNK6359 | Level 1   p35s(0.4 kb) - iLuxB - tOCS                                                                                                                                                                        | <a href="https://benchling.com/s/seq-iGulTHkamFwT15pJwMr6?m=slm-uL9SwDh90Cl2zzK95cdS">https://benchling.com/s/seq-iGulTHkamFwT15pJwMr6?m=slm-uL9SwDh90Cl2zzK95cdS</a>   |
| pNK6361 | Level 1   p35s(0.4 kb) - iLuxC - tOCS                                                                                                                                                                        | <a href="https://benchling.com/s/seq-HhJczSCOXbtrDqscfakv?m=slm-354btwib8r1hMXylnzVj">https://benchling.com/s/seq-HhJczSCOXbtrDqscfakv?m=slm-354btwib8r1hMXylnzVj</a>   |
| pNK6363 | Level 1   p35s(0.4 kb) - iLuxD - tOCS                                                                                                                                                                        | <a href="https://benchling.com/s/seq-X5tMVTn10Ll0yHXxXnzX?m=slm-TLciHUgakLS3DGq0FdLL">https://benchling.com/s/seq-X5tMVTn10Ll0yHXxXnzX?m=slm-TLciHUgakLS3DGq0FdLL</a>   |
| pNK6365 | Level 1   p35s(0.4 kb) - iLuxE - tOCS                                                                                                                                                                        | <a href="https://benchling.com/s/seq-04VdDNUXuThYsrm9J5zk?m=slm-nSOsz93zbbVpFWFwy9Ql">https://benchling.com/s/seq-04VdDNUXuThYsrm9J5zk?m=slm-nSOsz93zbbVpFWFwy9Ql</a>   |
| pNK6367 | Level 1   p35s(0.4 kb) - frp - tOCS                                                                                                                                                                          | <a href="https://benchling.com/s/seq-Zc7BGRR0psslBkAvocrn?m=slm-pRsZjLtm8waki3ukLPjo">https://benchling.com/s/seq-Zc7BGRR0psslBkAvocrn?m=slm-pRsZjLtm8waki3ukLPjo</a>   |
| pNK6369 | Level 1   p35s(0.4 kb) -chloroplast_transit_peptide-iLuxA - tOCS                                                                                                                                             | <a href="https://benchling.com/s/seq-xKBn7U0j4YrLkSVk0eYK?m=slm-bVS3mBcnBo03Vuzln1IF">https://benchling.com/s/seq-xKBn7U0j4YrLkSVk0eYK?m=slm-bVS3mBcnBo03Vuzln1IF</a>   |
| pNK6371 | Level 1   p35s(0.4 kb) -chloroplast_transit_peptide-iLuxB - tOCS                                                                                                                                             | <a href="https://benchling.com/s/seq-rZYCXpgDbgnwUQRAuxl2?m=slm-l5857JDdPVz95vCGJM1o">https://benchling.com/s/seq-rZYCXpgDbgnwUQRAuxl2?m=slm-l5857JDdPVz95vCGJM1o</a>   |
| pNK6373 | Level 1   p35s(0.4 kb) -chloroplast_transit_peptide-iLuxC - tOCS                                                                                                                                             | <a href="https://benchling.com/s/seq-rwCYI60SeCBI5kMeSfkq?m=slm-fncQqex2ookrBWzOpVl8">https://benchling.com/s/seq-rwCYI60SeCBI5kMeSfkq?m=slm-fncQqex2ookrBWzOpVl8</a>   |
| pNK6375 | Level 1   p35s(0.4 kb) -chloroplast_transit_peptide-iLuxD - tOCS                                                                                                                                             | <a href="https://benchling.com/s/seq-oDmtu6doZzDV1U1asoRB?m=slm-lyDksiP3zGwNiluVap2j">https://benchling.com/s/seq-oDmtu6doZzDV1U1asoRB?m=slm-lyDksiP3zGwNiluVap2j</a>   |
| pNK6377 | Level 1   p35s(0.4 kb) -chloroplast_transit_peptide-iLuxE - tOCS                                                                                                                                             | <a href="https://benchling.com/s/seq-u1D4fbNnAqPQrIBKY1w6?m=slm-Xh3JTMwHXJcfEg55R1nb">https://benchling.com/s/seq-u1D4fbNnAqPQrIBKY1w6?m=slm-Xh3JTMwHXJcfEg55R1nb</a>   |
| pNK6379 | Level 1   p35s(0.4 kb) --chloroplast_transit_peptide-frp - tOCS                                                                                                                                              | <a href="https://benchling.com/s/seq-U65pjinwhXL2EjjZf311L?m=slm-WC7YkOy3Sij4YSH7ox7u">https://benchling.com/s/seq-U65pjinwhXL2EjjZf311L?m=slm-WC7YkOy3Sij4YSH7ox7u</a> |
| pNK511  | <b>nnHispS, nnH3H_v2, nnLuz_v4, nnCPH</b><br>Level P   pNOS - KanR - tOCS   p35s - nnHispS - tOCS   p35s - Luz v4 - tAct2   p35s - nnCPH - tOCS   pFMV - nnH3H v2 - tNOS                                     | <a href="https://benchling.com/s/seq-GTulg6Rx7L3ISXacqilq?m=slm-h322lbfm0Y36Q9rbSwyA">https://benchling.com/s/seq-GTulg6Rx7L3ISXacqilq?m=slm-h322lbfm0Y36Q9rbSwyA</a>   |
| pNK497  | <b>FBP2</b><br>Level P   pNOS - KanR - tOCS   p35s - nnHispS - tOCS   pCmYLCV - NpgA - tATP   p35s - Luz v4 - tAct2   p35s - nnCPH - tOCS   pFMV - nnH3H v2 - tNOS                                           | <a href="https://benchling.com/s/seq-DgozAu4sYn937p5UdD6Z?m=slm-m38crKINPSj2Sg8dkAjq">https://benchling.com/s/seq-DgozAu4sYn937p5UdD6Z?m=slm-m38crKINPSj2Sg8dkAjq</a>   |
| pNK3071 | <b>FBP3</b><br>Level P   pNOS - KanR - tOCS   p35s - mcitHispS - tOCS   pCmYLCV - NpgA - tATP   p35s - Luz v4 - tAct2   p35s - nnCPH - tOCS   pFMV - nnH3H v2 - tNOS                                         | <a href="https://benchling.com/s/seq-NNKqOeRGCYTISxRYy3SQ?m=slm-78WwJlaPG6mU0O6gRBCC">https://benchling.com/s/seq-NNKqOeRGCYTISxRYy3SQ?m=slm-78WwJlaPG6mU0O6gRBCC</a>   |
| pNK6537 | <b>mcitHispS, nnH3H_v2, nnLuz_v4, nnCPH, NpgA</b><br>Level P   pNos - KanR - tOCS   p35s - mcitHispS - tOCS   pFMV - nnH3H_v2 - tNOS   p35s - nnLuz_v4 - tAct2   p35s - nnCPH - ocsT   pCmYLCV - npgA - tATP | <a href="https://benchling.com/s/seq-ihOTINEWjRUG85MDv5Ng?m=slm-npKsDdUw7TzPk38MbvYV">https://benchling.com/s/seq-ihOTINEWjRUG85MDv5Ng?m=slm-npKsDdUw7TzPk38MbvYV</a>   |
| pNK6541 | <b>nnHispS, nnH3H_v2, nnLuz_v4, nnCPH, NpgA</b><br>Level P   pNos - KanR - tOCS   p35s - nnHispS - tOCS   pFMV - nnH3H_v2 - tNOS   p35s - nnLuz_v4 - tAct2   p35s - nnCPH - ocsT   pCmYLCV - npgA - tATP     | <a href="https://benchling.com/s/seq-l5IRAnDAKaZtcokLeGbe?m=slm-OJwidfOKcolTkzZFRuqJ">https://benchling.com/s/seq-l5IRAnDAKaZtcokLeGbe?m=slm-OJwidfOKcolTkzZFRuqJ</a>   |

Supplementary Table 5. Transgenic plant lines used in this study.

| Plant species                | Plasmid, pathway                | Line ID                     |                             |
|------------------------------|---------------------------------|-----------------------------|-----------------------------|
| <i>Arabidopsis thaliana</i>  | pNK497, FBP2                    | AT6121                      |                             |
|                              |                                 | AT6123                      |                             |
|                              | pNK3071, FBP3                   | AT6124                      |                             |
|                              |                                 | AT6125                      |                             |
|                              |                                 | AT6126                      |                             |
|                              | <i>Chrysanthemum morifolium</i> | pNK497, FBP2                | CHR2105                     |
| <i>Nicotiana benthamiana</i> | pX037, FBP1                     | NB021 from ref <sup>1</sup> |                             |
|                              | pNK511                          | NB097                       |                             |
|                              |                                 | NB253                       |                             |
|                              |                                 | NB1291                      |                             |
|                              | pNK497, FBP2                    | NB072                       |                             |
|                              |                                 | NB081                       |                             |
|                              |                                 | NB103                       |                             |
|                              |                                 | NB104                       |                             |
|                              | pNK3071, FBP3                   | NB2186                      |                             |
|                              |                                 | NB5730                      |                             |
|                              |                                 | NB5732                      |                             |
|                              |                                 | NB5733                      |                             |
|                              |                                 | NB5734                      |                             |
|                              | <i>Nicotiana tabacum</i>        | pX037, FBP1                 | NT001 from ref <sup>1</sup> |
|                              |                                 | pNK497, FBP2                | NT2641                      |
|                              |                                 |                             | NT2817                      |
| NT2819                       |                                 |                             |                             |
| <i>Petunia hybrida</i>       | pNK497, FBP2                    | PET373                      |                             |
|                              | pNK3071, FBP3                   | PET2720                     |                             |
|                              |                                 | PET2234                     |                             |
| <i>Populus canadensis</i>    | pX037, FBP1                     | POP5                        |                             |
|                              | pNK497, FBP2                    | POP11                       |                             |

## Supplementary information references

1. Mitiouchkina, T. *et al.* Plants with genetically encoded autoluminescence. *Nat. Biotechnol.* (2020) doi:10.1038/s41587-020-0500-9.
